# Supplementary material for: Epidemiological and Virological Characteristics of Influenza in Chongqing, China, 2011-2015
Source: PLoS One. 2016 Dec 9;11(12):e0167866. doi: 10.1371/journal.pone.0167866 (PMC5148009; doi:10.1371/journal.pone.0167866)
Supplement: S1 File — (XLSX) [file pone.0167866.s001.xlsx]

## Sheet: Sheet1
性别	年龄	发病日期	VAR00003	VAR00002	VAR00001	month	原始标本PCR鉴定结果	agegroup	filter_$	sample	sample2	agegroup1
男	0.59	2015-01-15	3	2015	201501	#NULL!	B型	0	1	3	0	0
男	0.59	2015-01-17	1	2015	201501	#NULL!	B型	0	1	1	0	0
女	0.75	2015-03-01	2	2015	201501	#NULL!	B型	0	1	2	0	0
男	0.75	2015-02-11	10	2015	201501	#NULL!	B型	0	1	10	1	0
男	1	2015-02-06	3	2015	201501	#NULL!	B型	1	1	3	0	0
男	1	2015-04-20	3	2015	201502	#NULL!	B型	1	1	3	0	0
女	1	2015-01-11	1	2015	201501	#NULL!	B型	1	1	1	0	0
女	1	2015-01-21	1	2015	201501	#NULL!	B型	1	1	1	0	0
女	1	2015-03-09	1	2015	201501	#NULL!	B型	1	1	1	0	0
女	1	2015-12-04	1	2015	201504	#NULL!	B型	1	1	1	0	0
男	1	2015-12-07	0	2015	201504	#NULL!	B型	1	1	0	0	0
男	1	2015-12-10	0	2015	201504	#NULL!	B型	1	1	0	0	0
男	1	2015-02-13	8	2015	201501	#NULL!	B型	1	1	8	1	0
女	2	2015-11-22	3	2015	201504	#NULL!	B型	1	1	3	0	0
女	2	2015-02-15	1	2015	201501	#NULL!	B型	1	1	1	0	0
男	2	2015-04-03	1	2015	201502	#NULL!	B型	1	1	1	0	0
男	2	2015-02-01	0	2015	201501	#NULL!	B型	1	1	0	0	0
女	2	2015-03-05	0	2015	201501	#NULL!	B型	1	1	0	0	0
男	2	2015-06-24	0	2015	201502	#NULL!	B型	1	1	0	0	0
男	3	2015-03-15	3	2015	201501	#NULL!	B型	1	1	3	0	0
女	3	2015-04-20	3	2015	201502	#NULL!	B型	1	1	3	0	0
男	3	2015-01-14	2	2015	201501	#NULL!	B型	1	1	2	0	0
女	3	2015-01-27	2	2015	201501	#NULL!	B型	1	1	2	0	0
男	3	2015-05-07	2	2015	201502	#NULL!	B型	1	1	2	0	0
男	3	2015-11-08	2	2015	201504	#NULL!	B型	1	1	2	0	0
男	3	2015-02-05	1	2015	201501	#NULL!	B型	1	1	1	0	0
女	3	2015-02-12	1	2015	201501	#NULL!	B型	1	1	1	0	0
女	3	2015-03-21	1	2015	201501	#NULL!	B型	1	1	1	0	0
女	3	2015-07-07	1	2015	201503	#NULL!	B型	1	1	1	0	0
女	3	2015-10-11	1	2015	201504	#NULL!	B型	1	1	1	0	0
女	3	2015-11-11	1	2015	201504	#NULL!	B型	1	1	1	0	0
男	3	2015-11-22	1	2015	201504	#NULL!	B型	1	1	1	0	0
男	3	2015-03-24	0	2015	201501	#NULL!	B型	1	1	0	0	0
男	3	2015-10-28	0	2015	201504	#NULL!	B型	1	1	0	0	0
女	3	2015-11-19	0	2015	201504	#NULL!	B型	1	1	0	0	0
男	3	2015-12-15	0	2015	201504	#NULL!	B型	1	1	0	0	0
女	3	2015-12-16	0	2015	201504	#NULL!	B型	1	1	0	0	0
男	3	2015-12-21	0	2015	201504	#NULL!	B型	1	1	0	0	0
女	3	2015-02-14	7	2015	201501	#NULL!	B型	1	1	7	1	0
女	4	2015-10-09	3	2015	201504	#NULL!	B型	1	1	3	0	0
女	4	2015-01-22	2	2015	201501	#NULL!	B型	1	1	2	0	0
女	4	2015-02-25	2	2015	201501	#NULL!	B型	1	1	2	0	0
女	4	2015-05-23	2	2015	201502	#NULL!	B型	1	1	2	0	0
男	4	2015-06-14	2	2015	201502	#NULL!	B型	1	1	2	0	0
男	4	2015-11-14	2	2015	201504	#NULL!	B型	1	1	2	0	0
女	4	2015-11-27	2	2015	201504	#NULL!	B型	1	1	2	0	0
女	4	2015-12-21	2	2015	201504	#NULL!	B型	1	1	2	0	0
女	4	2015-12-29	2	2015	201504	#NULL!	B型	1	1	2	0	0
女	4	2015-02-14	1	2015	201501	#NULL!	B型	1	1	1	0	0
男	4	2015-03-25	1	2015	201501	#NULL!	B型	1	1	1	0	0
男	4	2015-03-30	1	2015	201501	#NULL!	B型	1	1	1	0	0
女	4	2015-10-26	1	2015	201504	#NULL!	B型	1	1	1	0	0
女	4	2015-12-22	1	2015	201504	#NULL!	B型	1	1	1	0	0
男	4	2015-01-08	0	2015	201501	#NULL!	B型	1	1	0	0	0
男	4	2015-01-15	0	2015	201501	#NULL!	B型	1	1	0	0	0
男	4	2015-02-22	0	2015	201501	#NULL!	B型	1	1	0	0	0
女	4	2015-03-09	0	2015	201501	#NULL!	B型	1	1	0	0	0
女	4	2015-12-07	0	2015	201504	#NULL!	B型	1	1	0	0	0
女	4	2015-12-28	0	2015	201504	#NULL!	B型	1	1	0	0	0
男	5	2015-01-21	2	2015	201501	#NULL!	B型	2	1	2	0	1
女	5	2015-02-23	2	2015	201501	#NULL!	B型	2	1	2	0	1
男	5	2015-11-06	2	2015	201504	#NULL!	B型	2	1	2	0	1
女	5	2015-12-13	2	2015	201504	#NULL!	B型	2	1	2	0	1
男	5	2015-12-19	2	2015	201504	#NULL!	B型	2	1	2	0	1
男	5	2015-01-13	1	2015	201501	#NULL!	B型	2	1	1	0	1
男	5	2015-01-22	1	2015	201501	#NULL!	B型	2	1	1	0	1
男	5	2015-06-15	1	2015	201502	#NULL!	B型	2	1	1	0	1
女	5	2015-09-15	1	2015	201503	#NULL!	B型	2	1	1	0	1
女	5	2015-10-16	1	2015	201504	#NULL!	B型	2	1	1	0	1
男	5	2015-11-06	1	2015	201504	#NULL!	B型	2	1	1	0	1
男	5	2015-11-22	1	2015	201504	#NULL!	B型	2	1	1	0	1
男	5	2015-11-22	1	2015	201504	#NULL!	B型	2	1	1	0	1
男	5	2015-01-08	0	2015	201501	#NULL!	B型	2	1	0	0	1
女	5	2015-10-13	0	2015	201504	#NULL!	B型	2	1	0	0	1
男	5	2015-10-26	0	2015	201504	#NULL!	B型	2	1	0	0	1
女	5	2015-11-19	0	2015	201504	#NULL!	B型	2	1	0	0	1
女	5	2015-12-16	0	2015	201504	#NULL!	B型	2	1	0	0	1
女	5	2015-12-28	0	2015	201504	#NULL!	B型	2	1	0	0	1
女	5	2015-12-30	0	2015	201504	#NULL!	B型	2	1	0	0	1
女	6	2015-11-22	3	2015	201504	#NULL!	B型	2	1	3	0	1
男	6	2015-11-22	3	2015	201504	#NULL!	B型	2	1	3	0	1
男	6	2015-11-22	3	2015	201504	#NULL!	B型	2	1	3	0	1
男	6	2015-12-12	3	2015	201504	#NULL!	B型	2	1	3	0	1
男	6	2015-01-04	2	2015	201501	#NULL!	B型	2	1	2	0	1
男	6	2015-02-23	2	2015	201501	#NULL!	B型	2	1	2	0	1
女	6	2015-05-18	2	2015	201502	#NULL!	B型	2	1	2	0	1
女	6	2015-11-23	2	2015	201504	#NULL!	B型	2	1	2	0	1
男	6	2015-11-24	2	2015	201504	#NULL!	B型	2	1	2	0	1
女	6	2015-12-01	2	2015	201504	#NULL!	B型	2	1	2	0	1
女	6	2015-12-06	2	2015	201504	#NULL!	B型	2	1	2	0	1
男	6	2015-12-13	2	2015	201504	#NULL!	B型	2	1	2	0	1
男	6	2015-01-23	1	2015	201501	#NULL!	B型	2	1	1	0	1
女	6	2015-03-10	1	2015	201501	#NULL!	B型	2	1	1	0	1
男	6	2015-03-11	1	2015	201501	#NULL!	B型	2	1	1	0	1
男	6	2015-05-18	1	2015	201502	#NULL!	B型	2	1	1	0	1
男	6	2015-08-08	1	2015	201503	#NULL!	B型	2	1	1	0	1
男	6	2015-09-07	1	2015	201503	#NULL!	B型	2	1	1	0	1
男	6	2015-11-24	1	2015	201504	#NULL!	B型	2	1	1	0	1
男	6	2015-11-24	1	2015	201504	#NULL!	B型	2	1	1	0	1
女	6	2015-12-22	1	2015	201504	#NULL!	B型	2	1	1	0	1
男	6	2015-12-29	1	2015	201504	#NULL!	B型	2	1	1	0	1
女	6	2015-03-24	0	2015	201501	#NULL!	B型	2	1	0	0	1
女	6	2015-06-17	0	2015	201502	#NULL!	B型	2	1	0	0	1
男	6	2015-06-18	0	2015	201502	#NULL!	B型	2	1	0	0	1
女	6	2015-12-04	0	2015	201504	#NULL!	B型	2	1	0	0	1
男	6	2015-12-04	0	2015	201504	#NULL!	B型	2	1	0	0	1
女	6	2015-12-29	0	2015	201504	#NULL!	B型	2	1	0	0	1
男	6	2015-12-29	0	2015	201504	#NULL!	B型	2	1	0	0	1
男	6	2015-12-30	0	2015	201504	#NULL!	B型	2	1	0	0	1
男	6	2015-02-02	4	2015	201501	#NULL!	B型	2	1	4	1	1
女	6	2015-05-02	4	2015	201502	#NULL!	B型	2	1	4	1	1
女	7	2015-05-30	3	2015	201502	#NULL!	B型	2	1	3	0	1
男	7	2015-11-22	3	2015	201504	#NULL!	B型	2	1	3	0	1
女	7	2015-11-23	3	2015	201504	#NULL!	B型	2	1	3	0	1
女	7	2015-11-24	3	2015	201504	#NULL!	B型	2	1	3	0	1
男	7	2015-12-25	3	2015	201504	#NULL!	B型	2	1	3	0	1
女	7	2015-01-19	2	2015	201501	#NULL!	B型	2	1	2	0	1
女	7	2015-04-09	2	2015	201502	#NULL!	B型	2	1	2	0	1
男	7	2015-04-12	2	2015	201502	#NULL!	B型	2	1	2	0	1
男	7	2015-11-21	2	2015	201504	#NULL!	B型	2	1	2	0	1
女	7	2015-11-23	2	2015	201504	#NULL!	B型	2	1	2	0	1
男	7	2015-12-06	2	2015	201504	#NULL!	B型	2	1	2	0	1
男	7	2015-01-11	1	2015	201501	#NULL!	B型	2	1	1	0	1
女	7	2015-01-17	1	2015	201501	#NULL!	B型	2	1	1	0	1
女	7	2015-02-03	1	2015	201501	#NULL!	B型	2	1	1	0	1
女	7	2015-02-21	1	2015	201501	#NULL!	B型	2	1	1	0	1
女	7	2015-03-19	1	2015	201501	#NULL!	B型	2	1	1	0	1
女	7	2015-04-17	1	2015	201502	#NULL!	B型	2	1	1	0	1
女	7	2015-11-20	1	2015	201504	#NULL!	B型	2	1	1	0	1
女	7	2015-11-21	1	2015	201504	#NULL!	B型	2	1	1	0	1
男	7	2015-11-21	1	2015	201504	#NULL!	B型	2	1	1	0	1
男	7	2015-12-27	1	2015	201504	#NULL!	B型	2	1	1	0	1
男	7	2015-01-07	0	2015	201501	#NULL!	B型	2	1	0	0	1
男	7	2015-09-21	0	2015	201503	#NULL!	B型	2	1	0	0	1
男	7	2015-11-02	0	2015	201504	#NULL!	B型	2	1	0	0	1
男	7	2015-11-26	0	2015	201504	#NULL!	B型	2	1	0	0	1
女	7	2015-12-03	0	2015	201504	#NULL!	B型	2	1	0	0	1
男	7	2015-12-04	0	2015	201504	#NULL!	B型	2	1	0	0	1
女	7	2015-01-12	4	2015	201501	#NULL!	B型	2	1	4	1	1
女	8	2015-06-08	3	2015	201502	#NULL!	B型	2	1	3	0	1
男	8	2015-11-08	3	2015	201504	#NULL!	B型	2	1	3	0	1
女	8	2015-11-17	3	2015	201504	#NULL!	B型	2	1	3	0	1
男	8	2015-11-22	3	2015	201504	#NULL!	B型	2	1	3	0	1
男	8	2015-11-22	3	2015	201504	#NULL!	B型	2	1	3	0	1
男	8	2015-03-29	2	2015	201501	#NULL!	B型	2	1	2	0	1
女	8	2015-06-18	2	2015	201502	#NULL!	B型	2	1	2	0	1
男	8	2015-11-17	2	2015	201504	#NULL!	B型	2	1	2	0	1
女	8	2015-11-18	2	2015	201504	#NULL!	B型	2	1	2	0	1
女	8	2015-11-18	2	2015	201504	#NULL!	B型	2	1	2	0	1
男	8	2015-11-18	2	2015	201504	#NULL!	B型	2	1	2	0	1
女	8	2015-11-25	2	2015	201504	#NULL!	B型	2	1	2	0	1
女	8	2015-12-21	2	2015	201504	#NULL!	B型	2	1	2	0	1
男	8	2015-03-28	1	2015	201501	#NULL!	B型	2	1	1	0	1
男	8	2015-09-17	1	2015	201503	#NULL!	B型	2	1	1	0	1
男	8	2015-10-20	1	2015	201504	#NULL!	B型	2	1	1	0	1
女	8	2015-11-06	1	2015	201504	#NULL!	B型	2	1	1	0	1
女	8	2015-11-20	1	2015	201504	#NULL!	B型	2	1	1	0	1
女	8	2015-11-29	1	2015	201504	#NULL!	B型	2	1	1	0	1
男	8	2015-11-30	1	2015	201504	#NULL!	B型	2	1	1	0	1
女	8	2015-12-20	1	2015	201504	#NULL!	B型	2	1	1	0	1
男	8	2015-12-21	1	2015	201504	#NULL!	B型	2	1	1	0	1
男	8	2015-01-13	0	2015	201501	#NULL!	B型	2	1	0	0	1
男	8	2015-01-26	0	2015	201501	#NULL!	B型	2	1	0	0	1
男	8	2015-04-01	0	2015	201502	#NULL!	B型	2	1	0	0	1
男	8	2015-06-28	0	2015	201502	#NULL!	B型	2	1	0	0	1
女	8	2015-10-11	0	2015	201504	#NULL!	B型	2	1	0	0	1
女	8	2015-10-25	0	2015	201504	#NULL!	B型	2	1	0	0	1
女	8	2015-11-18	0	2015	201504	#NULL!	B型	2	1	0	0	1
男	8	2015-12-04	0	2015	201504	#NULL!	B型	2	1	0	0	1
男	8	2015-06-28	4	2015	201503	#NULL!	B型	2	1	4	1	1
男	9	2015-11-23	3	2015	201504	#NULL!	B型	2	1	3	0	1
女	9	2015-03-23	2	2015	201501	#NULL!	B型	2	1	2	0	1
男	9	2015-10-29	2	2015	201504	#NULL!	B型	2	1	2	0	1
男	9	2015-11-01	2	2015	201504	#NULL!	B型	2	1	2	0	1
男	9	2015-11-17	2	2015	201504	#NULL!	B型	2	1	2	0	1
男	9	2015-01-14	1	2015	201501	#NULL!	B型	2	1	1	0	1
女	9	2015-01-25	1	2015	201501	#NULL!	B型	2	1	1	0	1
女	9	2015-01-26	1	2015	201501	#NULL!	B型	2	1	1	0	1
男	9	2015-03-11	1	2015	201501	#NULL!	B型	2	1	1	0	1
男	9	2015-11-05	1	2015	201504	#NULL!	B型	2	1	1	0	1
女	9	2015-11-15	1	2015	201504	#NULL!	B型	2	1	1	0	1
男	9	2015-11-23	1	2015	201504	#NULL!	B型	2	1	1	0	1
女	9	2015-12-03	0	2015	201504	#NULL!	B型	2	1	0	0	1
女	10	2015-03-18	3	2015	201501	#NULL!	B型	3	1	3	0	1
男	10	2015-11-05	2	2015	201504	#NULL!	B型	3	1	2	0	1
男	10	2015-11-08	1	2015	201504	#NULL!	B型	3	1	1	0	1
女	10	2015-12-02	1	2015	201504	#NULL!	B型	3	1	1	0	1
女	10	2015-12-07	1	2015	201504	#NULL!	B型	3	1	1	0	1
男	10	2015-06-02	0	2015	201502	#NULL!	B型	3	1	0	0	1
女	10.1	2015-12-22	1	2015	201504	#NULL!	B型	3	1	1	0	1
男	11	2015-12-21	0	2015	201504	#NULL!	B型	3	1	0	0	1
女	12	2015-11-10	3	2015	201504	#NULL!	B型	3	1	3	0	1
男	12	2015-12-16	3	2015	201504	#NULL!	B型	3	1	3	0	1
女	12	2015-11-29	2	2015	201504	#NULL!	B型	3	1	2	0	1
男	13	2015-04-14	3	2015	201502	#NULL!	B型	3	1	3	0	1
男	13	2015-12-22	1	2015	201504	#NULL!	B型	3	1	1	0	1
女	14	2015-12-16	1	2015	201504	#NULL!	B型	3	1	1	0	1
男	15	2015-09-22	2	2015	201503	#NULL!	B型	3	1	2	0	2
女	15	2015-12-13	4	2015	201504	#NULL!	B型	3	1	4	1	2
女	18	2015-11-27	0	2015	201504	#NULL!	B型	3	1	0	0	2
男	27	2015-02-10	1	2015	201501	#NULL!	B型	4	1	1	0	3
男	27	2015-03-05	1	2015	201501	#NULL!	B型	4	1	1	0	3
女	29	2015-02-15	1	2015	201501	#NULL!	B型	4	1	1	0	3
男	30	2015-12-15	1	2015	201504	#NULL!	B型	4	1	1	0	3
男	30	2015-01-28	4	2015	201501	#NULL!	B型	4	1	4	1	3
男	32	2015-02-19	2	2015	201501	#NULL!	B型	4	1	2	0	3
女	34	2015-02-10	3	2015	201501	#NULL!	B型	4	1	3	0	3
女	34	2015-11-26	0	2015	201504	#NULL!	B型	4	1	0	0	3
女	34	2015-05-19	8	2015	201502	#NULL!	B型	4	1	8	1	3
男	34	2015-10-20	4	2015	201504	#NULL!	B型	4	1	4	1	3
男	44	2015-12-21	3	2015	201504	#NULL!	B型	4	1	3	0	3
女	44	2015-08-02	5	2015	201503	#NULL!	B型	4	1	5	1	3
男	45	2015-01-07	5	2015	201501	#NULL!	B型	4	1	5	1	3
女	52	2015-02-19	0	2015	201501	#NULL!	B型	4	1	0	0	3
男	52	2015-12-26	5	2015	201504	#NULL!	B型	4	1	5	1	3
男	57	2015-02-09	2	2015	201501	#NULL!	B型	4	1	2	0	3
女	65	2015-02-25	1	2015	201501	#NULL!	B型	4	1	1	0	4
女	75	2015-09-28	0	2015	201503	#NULL!	B型	4	1	0	0	4
男	80	2015-12-22	1	2015	201504	#NULL!	B型	4	1	1	0	4
女	91	2015-10-04	1	2015	201504	#NULL!	B型	4	1	1	0	4
男	1	2015-03-16	3	2015	201501	#NULL!	B型	1	1	3	0	0
男	3	2015-03-09	2	2015	201501	#NULL!	B型	1	1	2	0	0
男	3	2015-11-15	2	2015	201504	#NULL!	B型	1	1	2	0	0
男	4	2015-03-15	1	2015	201501	#NULL!	B型	1	1	1	0	0
女	4	2015-12-26	1	2015	201504	#NULL!	B型	1	1	1	0	0
男	5	2015-11-15	2	2015	201504	#NULL!	B型	2	1	2	0	1
男	6	2015-11-12	3	2015	201504	#NULL!	B型	2	1	3	0	1
女	6	2015-12-22	0	2015	201504	#NULL!	B型	2	1	0	0	1
女	6	2015-12-22	0	2015	201504	#NULL!	B型	2	1	0	0	1
女	7	2015-01-08	1	2015	201501	#NULL!	B型	2	1	1	0	1
男	8	2015-12-02	3	2015	201504	#NULL!	B型	2	1	3	0	1
男	8	2015-12-26	1	2015	201504	#NULL!	B型	2	1	1	0	1
男	8	2015-08-31	0	2015	201503	#NULL!	B型	2	1	0	0	1
女	9	2015-12-07	1	2015	201504	#NULL!	B型	2	1	1	0	1
男	12	2015-12-08	3	2015	201504	#NULL!	B型	3	1	3	0	1
男	14	2015-10-22	0	2015	201504	#NULL!	B型	3	1	0	0	1
男	14	2015-01-23	4	2015	201501	#NULL!	B型	3	1	4	1	1
男	16	2015-01-12	3	2015	201501	#NULL!	B型	3	1	3	0	2
男	16	2015-11-28	3	2015	201504	#NULL!	B型	3	1	3	0	2
女	18	2015-12-20	2	2015	201504	#NULL!	B型	3	1	2	0	2
男	23	2015-12-15	7	2015	201504	#NULL!	B型	3	1	7	1	2
女	26	2015-12-30	1	2015	201504	#NULL!	B型	4	1	1	0	3
女	30	2015-12-10	1	2015	201504	#NULL!	B型	4	1	1	0	3
女	30	2015-12-23	1	2015	201504	#NULL!	B型	4	1	1	0	3
女	31	2015-05-30	3	2015	201502	#NULL!	B型	4	1	3	0	3
男	37	2015-02-02	0	2015	201501	#NULL!	B型	4	1	0	0	3
女	39	2015-02-01	5	2015	201501	#NULL!	B型	4	1	25	1	3
女	42	2015-12-26	1	2015	201504	#NULL!	B型	4	1	1	0	3
女	43	2015-03-07	0	2015	201501	#NULL!	B型	4	1	0	0	3
男	60	2015-12-08	1	2015	201504	#NULL!	B型	4	1	1	0	4
男	62	2015-02-25	3	2015	201501	#NULL!	B型	4	1	3	0	4
女	62	2015-12-18	4	2015	201504	#NULL!	B型	4	1	4	1	4
男	64	2015-01-03	4	2015	201501	#NULL!	B型	4	1	4	1	4
女	67	2015-03-13	3	2015	201501	#NULL!	B型	4	1	3	0	4
男	73	2015-04-10	1	2015	201502	#NULL!	B型	4	1	11	0	4
男	76	2015-12-12	0	2015	201504	#NULL!	B型	4	1	0	0	4
女	0.67	2015-12-03	0	2015	201504	#NULL!	B型	0	1	0	0	0
男	1	2015-12-19	2	2015	201504	#NULL!	B型	1	1	2	0	0
男	1	2015-12-20	1	2015	201504	#NULL!	B型	1	1	1	0	0
男	1	2015-11-18	0	2015	201504	#NULL!	B型	1	1	0	0	0
男	2	2015-12-02	0	2015	201504	#NULL!	B型	1	1	0	0	0
男	2	2015-12-28	0	2015	201504	#NULL!	B型	1	1	0	0	0
男	3	2015-12-11	1	2015	201504	#NULL!	B型	1	1	1	0	0
男	3	2015-11-30	0	2015	201504	#NULL!	B型	1	1	0	0	0
男	3	2015-12-28	0	2015	201504	#NULL!	B型	1	1	0	0	0
男	4	2015-12-21	2	2015	201504	#NULL!	B型	1	1	2	0	0
男	4	2015-12-21	0	2015	201504	#NULL!	B型	1	1	0	0	0
男	4	2015-12-28	0	2015	201504	#NULL!	B型	1	1	0	0	0
男	5	2015-12-20	1	2015	201504	#NULL!	B型	2	1	1	0	1
女	5	2015-12-29	1	2015	201504	#NULL!	B型	2	1	1	0	1
女	5	2015-12-28	0	2015	201504	#NULL!	B型	2	1	0	0	1
男	5	2015-12-28	0	2015	201504	#NULL!	B型	2	1	0	0	1
男	5	2015-12-29	0	2015	201504	#NULL!	B型	2	1	0	0	1
女	5	2015-12-30	0	2015	201504	#NULL!	B型	2	1	0	0	1
女	6	2015-12-28	1	2015	201504	#NULL!	B型	2	1	1	0	1
男	6	2015-12-29	1	2015	201504	#NULL!	B型	2	1	1	0	1
女	6	2015-12-29	0	2015	201504	#NULL!	B型	2	1	0	0	1
女	7	2015-12-28	0	2015	201504	#NULL!	B型	2	1	0	0	1
男	7	2015-12-28	0	2015	201504	#NULL!	B型	2	1	0	0	1
男	7	2015-12-29	0	2015	201504	#NULL!	B型	2	1	0	0	1
男	9	2015-12-21	2	2015	201504	#NULL!	B型	2	1	2	0	1
男	10.1	2015-12-24	3	2015	201504	#NULL!	B型	3	1	3	0	1
男	11	2015-12-28	0	2015	201504	#NULL!	B型	3	1	0	0	1
女	29	2015-12-18	4	2015	201504	#NULL!	B型	4	1	4	1	3
男	30	2015-12-23	2	2015	201504	#NULL!	B型	4	1	2	0	3
男	8	2015-01-18	1	2015	201501	#NULL!	混合型	2	1	1	0	1
男	0.16	2015-07-04	3	2015	201503	#NULL!	季H3	0	1	3	0	0
男	0.42	2015-01-28	2	2015	201501	#NULL!	季H3	0	1	2	0	0
女	0.5	2015-04-29	1	2015	201502	#NULL!	季H3	0	1	1	0	0
女	0.67	2015-07-09	1	2015	201503	#NULL!	季H3	0	1	1	0	0
男	0.75	2015-01-11	1	2015	201501	#NULL!	季H3	0	1	1	0	0
男	0.75	2015-02-08	1	2015	201501	#NULL!	季H3	0	1	1	0	0
男	0.75	2015-01-23	6	2015	201501	#NULL!	季H3	0	1	6	1	0
男	0.83	2015-01-19	1	2015	201501	#NULL!	季H3	0	1	1	0	0
男	1	2015-07-13	3	2015	201503	#NULL!	季H3	1	1	3	0	0
女	1	2015-01-12	2	2015	201501	#NULL!	季H3	1	1	2	0	0
男	1	2015-01-14	2	2015	201501	#NULL!	季H3	1	1	2	0	0
男	1	2015-08-12	2	2015	201503	#NULL!	季H3	1	1	2	0	0
男	1	2015-01-20	1	2015	201501	#NULL!	季H3	1	1	1	0	0
男	1	2015-02-15	1	2015	201501	#NULL!	季H3	1	1	1	0	0
女	1	2015-02-18	1	2015	201501	#NULL!	季H3	1	1	1	0	0
男	1	2015-07-08	1	2015	201503	#NULL!	季H3	1	1	1	0	0
男	1	2015-07-09	1	2015	201503	#NULL!	季H3	1	1	1	0	0
男	1	2015-07-09	1	2015	201503	#NULL!	季H3	1	1	1	0	0
女	1	2015-08-04	1	2015	201503	#NULL!	季H3	1	1	1	0	0
男	1	2015-09-05	1	2015	201503	#NULL!	季H3	1	1	1	0	0
女	1	2015-02-13	0	2015	201501	#NULL!	季H3	1	1	0	0	0
女	1	2015-06-11	0	2015	201502	#NULL!	季H3	1	1	0	0	0
男	1	2015-06-15	0	2015	201502	#NULL!	季H3	1	1	0	0	0
女	1	2015-07-08	0	2015	201503	#NULL!	季H3	1	1	0	0	0
男	1	2015-07-18	0	2015	201503	#NULL!	季H3	1	1	0	0	0
男	1	2015-07-20	0	2015	201503	#NULL!	季H3	1	1	0	0	0
男	1	2015-07-23	0	2015	201503	#NULL!	季H3	1	1	0	0	0
男	1	2015-08-08	0	2015	201503	#NULL!	季H3	1	1	0	0	0
男	1	2015-08-08	0	2015	201503	#NULL!	季H3	1	1	0	0	0
男	1	2015-08-10	0	2015	201503	#NULL!	季H3	1	1	0	0	0
女	1	2015-06-27	5	2015	201503	#NULL!	季H3	1	1	5	1	0
女	2	2015-06-25	3	2015	201502	#NULL!	季H3	1	1	3	0	0
女	2	2015-07-11	3	2015	201503	#NULL!	季H3	1	1	3	0	0
男	2	2015-08-28	3	2015	201503	#NULL!	季H3	1	1	3	0	0
男	2	2015-01-06	2	2015	201501	#NULL!	季H3	1	1	2	0	0
女	2	2015-06-21	2	2015	201502	#NULL!	季H3	1	1	2	0	0
男	2	2015-06-24	2	2015	201502	#NULL!	季H3	1	1	2	0	0
女	2	2015-01-28	1	2015	201501	#NULL!	季H3	1	1	1	0	0
男	2	2015-02-05	1	2015	201501	#NULL!	季H3	1	1	1	0	0
男	2	2015-02-23	1	2015	201501	#NULL!	季H3	1	1	1	0	0
男	2	2015-03-03	1	2015	201501	#NULL!	季H3	1	1	1	0	0
女	2	2015-06-01	1	2015	201502	#NULL!	季H3	1	1	1	0	0
男	2	2015-06-17	1	2015	201502	#NULL!	季H3	1	1	1	0	0
女	2	2015-06-30	1	2015	201503	#NULL!	季H3	1	1	1	0	0
男	2	2015-07-15	1	2015	201503	#NULL!	季H3	1	1	1	0	0
男	2	2015-07-25	1	2015	201503	#NULL!	季H3	1	1	1	0	0
女	2	2015-07-27	1	2015	201503	#NULL!	季H3	1	1	1	0	0
男	2	2015-08-04	1	2015	201503	#NULL!	季H3	1	1	1	0	0
男	2	2015-01-08	0	2015	201501	#NULL!	季H3	1	1	0	0	0
女	2	2015-03-14	0	2015	201501	#NULL!	季H3	1	1	0	0	0
男	2	2015-07-27	0	2015	201503	#NULL!	季H3	1	1	0	0	0
男	3	2015-01-12	3	2015	201501	#NULL!	季H3	1	1	3	0	0
男	3	2015-05-27	3	2015	201502	#NULL!	季H3	1	1	3	0	0
女	3	2015-01-21	2	2015	201501	#NULL!	季H3	1	1	2	0	0
男	3	2015-04-26	2	2015	201502	#NULL!	季H3	1	1	2	0	0
男	3	2015-05-02	2	2015	201502	#NULL!	季H3	1	1	2	0	0
男	3	2015-06-18	2	2015	201502	#NULL!	季H3	1	1	2	0	0
男	3	2015-07-04	2	2015	201503	#NULL!	季H3	1	1	2	0	0
女	3	2015-07-12	2	2015	201503	#NULL!	季H3	1	1	2	0	0
男	3	2015-01-05	1	2015	201501	#NULL!	季H3	1	1	1	0	0
女	3	2015-01-11	1	2015	201501	#NULL!	季H3	1	1	1	0	0
男	3	2015-02-08	1	2015	201501	#NULL!	季H3	1	1	1	0	0
男	3	2015-02-23	1	2015	201501	#NULL!	季H3	1	1	1	0	0
男	3	2015-06-14	1	2015	201502	#NULL!	季H3	1	1	1	0	0
男	3	2015-07-02	1	2015	201503	#NULL!	季H3	1	1	1	0	0
女	3	2015-07-05	1	2015	201503	#NULL!	季H3	1	1	1	0	0
女	3	2015-07-08	1	2015	201503	#NULL!	季H3	1	1	1	0	0
男	3	2015-07-15	1	2015	201503	#NULL!	季H3	1	1	1	0	0
女	3	2015-07-18	1	2015	201503	#NULL!	季H3	1	1	1	0	0
男	3	2015-06-11	0	2015	201502	#NULL!	季H3	1	1	0	0	0
男	3	2015-06-23	0	2015	201502	#NULL!	季H3	1	1	0	0	0
男	3	2015-06-27	0	2015	201502	#NULL!	季H3	1	1	0	0	0
男	3	2015-07-10	0	2015	201503	#NULL!	季H3	1	1	0	0	0
女	3	2015-07-14	0	2015	201503	#NULL!	季H3	1	1	0	0	0
男	3	2015-07-19	0	2015	201503	#NULL!	季H3	1	1	0	0	0
女	3	2015-07-22	0	2015	201503	#NULL!	季H3	1	1	0	0	0
男	3	2015-07-22	0	2015	201503	#NULL!	季H3	1	1	0	0	0
女	3	2015-07-23	0	2015	201503	#NULL!	季H3	1	1	0	0	0
男	3	2015-08-09	0	2015	201503	#NULL!	季H3	1	1	0	0	0
男	4	2015-01-26	3	2015	201501	#NULL!	季H3	1	1	3	0	0
女	4	2015-07-11	3	2015	201503	#NULL!	季H3	1	1	3	0	0
女	4	2015-07-11	3	2015	201503	#NULL!	季H3	1	1	3	0	0
男	4	2015-01-20	2	2015	201501	#NULL!	季H3	1	1	2	0	0
男	4	2015-01-27	2	2015	201501	#NULL!	季H3	1	1	2	0	0
女	4	2015-06-13	2	2015	201502	#NULL!	季H3	1	1	2	0	0
女	4	2015-06-22	2	2015	201502	#NULL!	季H3	1	1	2	0	0
女	4	2015-06-25	2	2015	201502	#NULL!	季H3	1	1	2	0	0
女	4	2015-07-01	2	2015	201503	#NULL!	季H3	1	1	2	0	0
男	4	2015-07-07	2	2015	201503	#NULL!	季H3	1	1	2	0	0
男	4	2015-07-07	2	2015	201503	#NULL!	季H3	1	1	2	0	0
男	4	2015-08-26	2	2015	201503	#NULL!	季H3	1	1	2	0	0
女	4	2015-02-02	1	2015	201501	#NULL!	季H3	1	1	1	0	0
男	4	2015-05-20	1	2015	201502	#NULL!	季H3	1	1	1	0	0
女	4	2015-06-15	1	2015	201502	#NULL!	季H3	1	1	1	0	0
女	4	2015-06-23	1	2015	201502	#NULL!	季H3	1	1	1	0	0
女	4	2015-07-05	1	2015	201503	#NULL!	季H3	1	1	1	0	0
男	4	2015-07-07	1	2015	201503	#NULL!	季H3	1	1	1	0	0
女	4	2015-07-09	1	2015	201503	#NULL!	季H3	1	1	1	0	0
女	4	2015-07-15	1	2015	201503	#NULL!	季H3	1	1	1	0	0
男	4	2015-08-02	1	2015	201503	#NULL!	季H3	1	1	1	0	0
女	4	2015-08-06	1	2015	201503	#NULL!	季H3	1	1	1	0	0
男	4	2015-01-05	0	2015	201501	#NULL!	季H3	1	1	0	0	0
女	4	2015-03-12	0	2015	201501	#NULL!	季H3	1	1	0	0	0
男	4	2015-06-17	0	2015	201502	#NULL!	季H3	1	1	0	0	0
男	4	2015-06-29	0	2015	201502	#NULL!	季H3	1	1	0	0	0
男	4	2015-06-30	0	2015	201502	#NULL!	季H3	1	1	0	0	0
男	4	2015-07-05	0	2015	201503	#NULL!	季H3	1	1	0	0	0
男	4	2015-07-05	0	2015	201503	#NULL!	季H3	1	1	0	0	0
男	4	2015-07-06	0	2015	201503	#NULL!	季H3	1	1	0	0	0
男	4	2015-07-08	0	2015	201503	#NULL!	季H3	1	1	0	0	0
女	4	2015-07-17	0	2015	201503	#NULL!	季H3	1	1	0	0	0
女	4	2015-07-26	0	2015	201503	#NULL!	季H3	1	1	0	0	0
男	5	2015-07-04	3	2015	201503	#NULL!	季H3	2	1	3	0	1
女	5	2015-01-28	2	2015	201501	#NULL!	季H3	2	1	2	0	1
女	5	2015-05-28	2	2015	201502	#NULL!	季H3	2	1	2	0	1
女	5	2015-07-06	2	2015	201503	#NULL!	季H3	2	1	2	0	1
女	5	2015-07-21	2	2015	201503	#NULL!	季H3	2	1	2	0	1
女	5	2015-01-22	1	2015	201501	#NULL!	季H3	2	1	1	0	1
男	5	2015-01-22	1	2015	201501	#NULL!	季H3	2	1	1	0	1
男	5	2015-04-22	1	2015	201502	#NULL!	季H3	2	1	1	0	1
女	5	2015-06-10	1	2015	201502	#NULL!	季H3	2	1	1	0	1
男	5	2015-06-28	1	2015	201502	#NULL!	季H3	2	1	1	0	1
男	5	2015-07-06	1	2015	201503	#NULL!	季H3	2	1	1	0	1
女	5	2015-07-09	1	2015	201503	#NULL!	季H3	2	1	1	0	1
女	5	2015-07-15	1	2015	201503	#NULL!	季H3	2	1	1	0	1
女	5	2015-01-19	0	2015	201501	#NULL!	季H3	2	1	0	0	1
女	5	2015-01-25	0	2015	201501	#NULL!	季H3	2	1	0	0	1
男	5	2015-06-14	0	2015	201502	#NULL!	季H3	2	1	0	0	1
男	5	2015-07-08	0	2015	201503	#NULL!	季H3	2	1	0	0	1
男	5	2015-07-23	0	2015	201503	#NULL!	季H3	2	1	0	0	1
男	6	2015-05-06	3	2015	201502	#NULL!	季H3	2	1	3	0	1
男	6	2015-06-24	3	2015	201502	#NULL!	季H3	2	1	3	0	1
女	6	2015-07-04	3	2015	201503	#NULL!	季H3	2	1	3	0	1
男	6	2015-07-04	3	2015	201503	#NULL!	季H3	2	1	3	0	1
女	6	2015-01-31	2	2015	201501	#NULL!	季H3	2	1	2	0	1
男	6	2015-06-12	2	2015	201502	#NULL!	季H3	2	1	2	0	1
女	6	2015-06-24	2	2015	201502	#NULL!	季H3	2	1	2	0	1
男	6	2015-07-07	2	2015	201503	#NULL!	季H3	2	1	2	0	1
女	6	2015-07-20	2	2015	201503	#NULL!	季H3	2	1	2	0	1
男	6	2015-01-01	1	2015	201501	#NULL!	季H3	2	1	1	0	1
女	6	2015-01-04	1	2015	201501	#NULL!	季H3	2	1	1	0	1
男	6	2015-01-10	1	2015	201501	#NULL!	季H3	2	1	1	0	1
男	6	2015-01-20	1	2015	201501	#NULL!	季H3	2	1	1	0	1
女	6	2015-01-25	1	2015	201501	#NULL!	季H3	2	1	1	0	1
男	6	2015-03-24	1	2015	201501	#NULL!	季H3	2	1	1	0	1
女	6	2015-06-28	1	2015	201502	#NULL!	季H3	2	1	1	0	1
女	6	2015-06-28	1	2015	201502	#NULL!	季H3	2	1	1	0	1
女	6	2015-07-14	1	2015	201503	#NULL!	季H3	2	1	1	0	1
男	6	2015-07-14	0	2015	201503	#NULL!	季H3	2	1	0	0	1
男	7	2015-06-08	3	2015	201502	#NULL!	季H3	2	1	3	0	1
男	7	2015-06-23	3	2015	201502	#NULL!	季H3	2	1	3	0	1
女	7	2015-07-12	3	2015	201503	#NULL!	季H3	2	1	3	0	1
男	7	2015-01-03	2	2015	201501	#NULL!	季H3	2	1	2	0	1
男	7	2015-01-11	2	2015	201501	#NULL!	季H3	2	1	2	0	1
男	7	2015-01-21	2	2015	201501	#NULL!	季H3	2	1	2	0	1
女	7	2015-06-14	2	2015	201502	#NULL!	季H3	2	1	2	0	1
女	7	2015-01-07	1	2015	201501	#NULL!	季H3	2	1	1	0	1
女	7	2015-01-12	1	2015	201501	#NULL!	季H3	2	1	1	0	1
女	7	2015-01-19	1	2015	201501	#NULL!	季H3	2	1	1	0	1
男	7	2015-02-12	1	2015	201501	#NULL!	季H3	2	1	1	0	1
女	7	2015-03-24	1	2015	201501	#NULL!	季H3	2	1	1	0	1
男	7	2015-07-01	1	2015	201503	#NULL!	季H3	2	1	1	0	1
男	7	2015-07-09	1	2015	201503	#NULL!	季H3	2	1	1	0	1
男	7	2015-07-13	1	2015	201503	#NULL!	季H3	2	1	1	0	1
女	7	2015-07-22	1	2015	201503	#NULL!	季H3	2	1	1	0	1
男	7	2015-07-22	1	2015	201503	#NULL!	季H3	2	1	1	0	1
女	7	2015-08-09	1	2015	201503	#NULL!	季H3	2	1	1	0	1
男	7	2015-01-07	0	2015	201501	#NULL!	季H3	2	1	0	0	1
女	7	2015-07-03	0	2015	201503	#NULL!	季H3	2	1	0	0	1
男	7	2015-07-14	0	2015	201503	#NULL!	季H3	2	1	0	0	1
男	8	2015-01-17	3	2015	201501	#NULL!	季H3	2	1	3	0	1
男	8	2015-04-19	3	2015	201502	#NULL!	季H3	2	1	3	0	1
女	8	2015-06-23	3	2015	201502	#NULL!	季H3	2	1	3	0	1
女	8	2015-07-11	3	2015	201503	#NULL!	季H3	2	1	3	0	1
男	8	2015-07-11	3	2015	201503	#NULL!	季H3	2	1	3	0	1
男	8	2015-01-16	2	2015	201501	#NULL!	季H3	2	1	2	0	1
女	8	2015-03-19	2	2015	201501	#NULL!	季H3	2	1	2	0	1
男	8	2015-06-24	2	2015	201502	#NULL!	季H3	2	1	2	0	1
男	8	2015-06-28	2	2015	201502	#NULL!	季H3	2	1	2	0	1
女	8	2015-07-12	2	2015	201503	#NULL!	季H3	2	1	2	0	1
女	8	2014-12-31	1	2015	201501	#NULL!	季H3	2	1	1	0	1
男	8	2015-01-04	1	2015	201501	#NULL!	季H3	2	1	1	0	1
男	8	2015-01-11	1	2015	201501	#NULL!	季H3	2	1	1	0	1
男	8	2015-01-12	1	2015	201501	#NULL!	季H3	2	1	1	0	1
男	8	2015-01-18	1	2015	201501	#NULL!	季H3	2	1	1	0	1
男	8	2015-06-13	1	2015	201502	#NULL!	季H3	2	1	1	0	1
男	8	2015-06-13	1	2015	201502	#NULL!	季H3	2	1	1	0	1
男	8	2015-06-23	1	2015	201502	#NULL!	季H3	2	1	1	0	1
女	8	2015-07-08	1	2015	201503	#NULL!	季H3	2	1	1	0	1
男	8	2015-07-12	1	2015	201503	#NULL!	季H3	2	1	1	0	1
女	8	2015-07-13	1	2015	201503	#NULL!	季H3	2	1	1	0	1
女	8	2015-07-13	1	2015	201503	#NULL!	季H3	2	1	1	0	1
女	8	2015-01-13	0	2015	201501	#NULL!	季H3	2	1	0	0	1
男	8	2015-06-26	0	2015	201502	#NULL!	季H3	2	1	0	0	1
女	8	2015-07-08	0	2015	201503	#NULL!	季H3	2	1	0	0	1
女	8	2015-01-11	5	2015	201501	#NULL!	季H3	2	1	5	1	1
女	8	2015-01-10	4	2015	201501	#NULL!	季H3	2	1	4	1	1
女	8	2015-07-04	4	2015	201503	#NULL!	季H3	2	1	4	1	1
女	9	2015-03-18	3	2015	201501	#NULL!	季H3	2	1	3	0	1
男	9	2015-03-18	3	2015	201501	#NULL!	季H3	2	1	3	0	1
女	9	2015-04-13	3	2015	201502	#NULL!	季H3	2	1	3	0	1
男	9	2015-06-23	3	2015	201502	#NULL!	季H3	2	1	3	0	1
男	9	2015-06-25	3	2015	201502	#NULL!	季H3	2	1	3	0	1
男	9	2015-06-25	3	2015	201502	#NULL!	季H3	2	1	3	0	1
女	9	2015-01-12	2	2015	201501	#NULL!	季H3	2	1	2	0	1
女	9	2015-02-21	2	2015	201501	#NULL!	季H3	2	1	2	0	1
女	9	2015-06-09	2	2015	201502	#NULL!	季H3	2	1	2	0	1
女	9	2015-06-13	2	2015	201502	#NULL!	季H3	2	1	2	0	1
男	9	2015-06-20	2	2015	201502	#NULL!	季H3	2	1	2	0	1
男	9	2015-07-28	2	2015	201503	#NULL!	季H3	2	1	2	0	1
男	9	2015-03-28	1	2015	201501	#NULL!	季H3	2	1	1	0	1
女	9	2015-06-28	1	2015	201502	#NULL!	季H3	2	1	1	0	1
男	9	2015-07-04	1	2015	201503	#NULL!	季H3	2	1	1	0	1
男	9	2015-07-05	1	2015	201503	#NULL!	季H3	2	1	1	0	1
男	9	2015-01-15	0	2015	201501	#NULL!	季H3	2	1	0	0	1
男	9	2015-06-26	0	2015	201502	#NULL!	季H3	2	1	0	0	1
女	9	2015-07-10	0	2015	201503	#NULL!	季H3	2	1	0	0	1
女	10	2015-03-08	3	2015	201501	#NULL!	季H3	3	1	3	0	1
女	10	2015-06-23	3	2015	201502	#NULL!	季H3	3	1	3	0	1
女	10	2015-06-24	3	2015	201502	#NULL!	季H3	3	1	3	0	1
男	10	2015-07-04	3	2015	201503	#NULL!	季H3	3	1	3	0	1
男	10	2015-01-03	2	2015	201501	#NULL!	季H3	3	1	2	0	1
女	10	2015-01-07	2	2015	201501	#NULL!	季H3	3	1	2	0	1
男	10	2015-01-14	2	2015	201501	#NULL!	季H3	3	1	2	0	1
女	10	2015-01-06	1	2015	201501	#NULL!	季H3	3	1	1	0	1
女	10	2015-03-31	1	2015	201502	#NULL!	季H3	3	1	1	0	1
女	10	2015-04-03	1	2015	201502	#NULL!	季H3	3	1	1	0	1
男	10	2015-06-25	1	2015	201502	#NULL!	季H3	3	1	1	0	1
男	10	2015-06-25	1	2015	201502	#NULL!	季H3	3	1	1	0	1
男	10	2015-07-13	1	2015	201503	#NULL!	季H3	3	1	1	0	1
女	10	2015-01-19	0	2015	201501	#NULL!	季H3	3	1	0	0	1
男	10.1	2015-06-11	2	2015	201502	#NULL!	季H3	3	1	2	0	1
女	10.1	2015-07-09	1	2015	201503	#NULL!	季H3	3	1	1	0	1
女	10.1	2015-05-27	0	2015	201502	#NULL!	季H3	3	1	0	0	1
男	10.1	2015-07-02	0	2015	201503	#NULL!	季H3	3	1	0	0	1
男	10.16	2015-07-09	1	2015	201503	#NULL!	季H3	3	1	1	0	1
女	11	2015-06-08	3	2015	201502	#NULL!	季H3	3	1	3	0	1
女	11	2015-06-23	3	2015	201502	#NULL!	季H3	3	1	3	0	1
男	11	2015-07-11	3	2015	201503	#NULL!	季H3	3	1	3	0	1
女	11	2015-08-04	3	2015	201503	#NULL!	季H3	3	1	3	0	1
女	11	2015-01-24	2	2015	201501	#NULL!	季H3	3	1	2	0	1
女	11	2015-07-09	1	2015	201503	#NULL!	季H3	3	1	1	0	1
男	11	2015-01-18	0	2015	201501	#NULL!	季H3	3	1	0	0	1
女	11	2015-07-22	0	2015	201503	#NULL!	季H3	3	1	0	0	1
男	11	2015-06-24	4	2015	201502	#NULL!	季H3	3	1	4	1	1
女	12	2015-06-24	3	2015	201502	#NULL!	季H3	3	1	3	0	1
女	12	2015-07-04	3	2015	201503	#NULL!	季H3	3	1	3	0	1
女	12	2015-01-13	2	2015	201501	#NULL!	季H3	3	1	2	0	1
男	12	2015-06-24	2	2015	201502	#NULL!	季H3	3	1	2	0	1
女	12	2015-07-01	1	2015	201503	#NULL!	季H3	3	1	1	0	1
男	12	2015-07-21	1	2015	201503	#NULL!	季H3	3	1	1	0	1
男	12	2015-06-26	0	2015	201502	#NULL!	季H3	3	1	0	0	1
女	12	2015-06-30	0	2015	201502	#NULL!	季H3	3	1	0	0	1
男	13	2015-06-11	3	2015	201502	#NULL!	季H3	3	1	3	0	1
男	13	2015-06-24	3	2015	201502	#NULL!	季H3	3	1	3	0	1
女	13	2015-01-14	2	2015	201501	#NULL!	季H3	3	1	2	0	1
女	13	2015-01-20	2	2015	201501	#NULL!	季H3	3	1	2	0	1
女	13	2015-06-19	1	2015	201502	#NULL!	季H3	3	1	1	0	1
女	13	2015-07-08	0	2015	201503	#NULL!	季H3	3	1	0	0	1
女	13	2015-07-18	0	2015	201503	#NULL!	季H3	3	1	0	0	1
女	14	2015-07-04	3	2015	201503	#NULL!	季H3	3	1	3	0	1
男	14	2015-07-04	3	2015	201503	#NULL!	季H3	3	1	3	0	1
女	14	2015-02-07	1	2015	201501	#NULL!	季H3	3	1	1	0	1
男	14	2015-06-20	1	2015	201502	#NULL!	季H3	3	1	1	0	1
女	14	2015-01-27	0	2015	201501	#NULL!	季H3	3	1	0	0	1
女	14	2015-01-27	0	2015	201501	#NULL!	季H3	3	1	0	0	1
男	14	2015-01-30	0	2015	201501	#NULL!	季H3	3	1	0	0	1
女	14	2015-06-25	0	2015	201502	#NULL!	季H3	3	1	0	0	1
男	15	2015-01-11	3	2015	201501	#NULL!	季H3	3	1	3	0	2
男	15	2015-02-08	1	2015	201501	#NULL!	季H3	3	1	1	0	2
女	15	2015-06-18	1	2015	201502	#NULL!	季H3	3	1	1	0	2
女	15	2015-07-20	1	2015	201503	#NULL!	季H3	3	1	1	0	2
男	15	2015-06-07	0	2015	201502	#NULL!	季H3	3	1	0	0	2
女	15	2015-06-18	0	2015	201502	#NULL!	季H3	3	1	0	0	2
男	15	2015-07-10	0	2015	201503	#NULL!	季H3	3	1	0	0	2
女	15	2015-01-19	4	2015	201501	#NULL!	季H3	3	1	4	1	2
男	15	2015-01-21	4	2015	201501	#NULL!	季H3	3	1	4	1	2
男	16	2015-01-20	1	2015	201501	#NULL!	季H3	3	1	1	0	2
男	16	2015-06-16	1	2015	201502	#NULL!	季H3	3	1	1	0	2
男	16	2015-06-30	1	2015	201503	#NULL!	季H3	3	1	1	0	2
男	16	2015-01-27	0	2015	201501	#NULL!	季H3	3	1	0	0	2
男	16	2015-06-18	0	2015	201502	#NULL!	季H3	3	1	0	0	2
女	16	2015-06-19	0	2015	201502	#NULL!	季H3	3	1	0	0	2
女	17	2015-06-17	1	2015	201502	#NULL!	季H3	3	1	1	0	2
女	17	2015-06-22	1	2015	201502	#NULL!	季H3	3	1	1	0	2
女	17	2015-07-10	1	2015	201503	#NULL!	季H3	3	1	1	0	2
女	17	2015-06-19	0	2015	201502	#NULL!	季H3	3	1	0	0	2
男	17	2015-01-04	7	2015	201501	#NULL!	季H3	3	1	7	1	2
男	17	2015-02-20	5	2015	201501	#NULL!	季H3	3	1	5	1	2
男	18	2015-01-18	1	2015	201501	#NULL!	季H3	3	1	1	0	2
男	18	2015-06-22	0	2015	201502	#NULL!	季H3	3	1	0	0	2
女	18	2015-07-05	0	2015	201503	#NULL!	季H3	3	1	0	0	2
女	18	2015-07-05	4	2015	201503	#NULL!	季H3	3	1	4	1	2
男	19	2015-06-02	3	2015	201502	#NULL!	季H3	3	1	3	0	2
男	19	2015-06-18	1	2015	201502	#NULL!	季H3	3	1	1	0	2
男	19	2015-06-16	0	2015	201502	#NULL!	季H3	3	1	0	0	2
女	19	2015-07-19	0	2015	201503	#NULL!	季H3	3	1	0	0	2
男	20	2015-07-03	2	2015	201503	#NULL!	季H3	3	1	2	0	2
男	20	2015-07-09	2	2015	201503	#NULL!	季H3	3	1	2	0	2
女	20	2015-01-17	1	2015	201501	#NULL!	季H3	3	1	1	0	2
女	20	2015-07-16	1	2015	201503	#NULL!	季H3	3	1	1	0	2
男	20	2015-07-08	0	2015	201503	#NULL!	季H3	3	1	0	0	2
男	20	2015-07-01	6	2015	201503	#NULL!	季H3	3	1	6	1	2
男	20	2015-06-25	5	2015	201502	#NULL!	季H3	3	1	5	1	2
男	21	2015-06-19	1	2015	201502	#NULL!	季H3	3	1	1	0	2
男	21	2015-06-25	1	2015	201502	#NULL!	季H3	3	1	1	0	2
女	21	2015-06-09	0	2015	201502	#NULL!	季H3	3	1	0	0	2
女	22	2015-06-27	1	2015	201502	#NULL!	季H3	3	1	1	0	2
男	22	2015-07-03	1	2015	201503	#NULL!	季H3	3	1	1	0	2
男	22	2015-07-08	0	2015	201503	#NULL!	季H3	3	1	0	0	2
女	23	2015-06-17	3	2015	201502	#NULL!	季H3	3	1	3	0	2
男	23	2015-04-18	2	2015	201502	#NULL!	季H3	3	1	2	0	2
女	23	2015-06-28	1	2015	201502	#NULL!	季H3	3	1	1	0	2
男	23	2015-06-25	0	2015	201502	#NULL!	季H3	3	1	0	0	2
女	24	2015-07-02	1	2015	201503	#NULL!	季H3	3	1	1	0	2
女	24	2015-07-04	1	2015	201503	#NULL!	季H3	3	1	1	0	2
女	24	2015-07-04	1	2015	201503	#NULL!	季H3	3	1	1	0	2
女	24	2015-03-10	0	2015	201501	#NULL!	季H3	3	1	0	0	2
男	24	2015-06-18	0	2015	201502	#NULL!	季H3	3	1	0	0	2
女	24	2015-06-28	0	2015	201502	#NULL!	季H3	3	1	0	0	2
男	25	2015-06-19	2	2015	201502	#NULL!	季H3	4	1	2	0	3
男	25	2015-02-11	1	2015	201501	#NULL!	季H3	4	1	1	0	3
男	25	2015-06-29	1	2015	201502	#NULL!	季H3	4	1	1	0	3
女	25	2015-07-03	1	2015	201503	#NULL!	季H3	4	1	1	0	3
男	25	2015-07-09	1	2015	201503	#NULL!	季H3	4	1	1	0	3
男	25	2015-02-09	0	2015	201501	#NULL!	季H3	4	1	0	0	3
男	25	2015-06-14	0	2015	201502	#NULL!	季H3	4	1	0	0	3
男	25	2015-06-19	0	2015	201502	#NULL!	季H3	4	1	0	0	3
女	25	2015-06-24	0	2015	201502	#NULL!	季H3	4	1	0	0	3
男	26	2015-03-22	2	2015	201501	#NULL!	季H3	4	1	2	0	3
男	26	2015-06-20	2	2015	201502	#NULL!	季H3	4	1	2	0	3
男	26	2015-07-19	2	2015	201503	#NULL!	季H3	4	1	2	0	3
男	26	2015-07-25	2	2015	201503	#NULL!	季H3	4	1	2	0	3
女	26	2015-06-23	1	2015	201502	#NULL!	季H3	4	1	1	0	3
女	26	2015-07-12	1	2015	201503	#NULL!	季H3	4	1	1	0	3
女	26	2015-01-06	0	2015	201501	#NULL!	季H3	4	1	0	0	3
男	26	2015-06-29	0	2015	201502	#NULL!	季H3	4	1	0	0	3
男	26	2015-06-29	0	2015	201502	#NULL!	季H3	4	1	0	0	3
女	27	2015-06-23	3	2015	201502	#NULL!	季H3	4	1	3	0	3
男	27	2015-05-09	2	2015	201502	#NULL!	季H3	4	1	2	0	3
男	27	2015-06-26	2	2015	201502	#NULL!	季H3	4	1	2	0	3
女	27	2015-02-05	1	2015	201501	#NULL!	季H3	4	1	1	0	3
男	27	2015-06-20	1	2015	201502	#NULL!	季H3	4	1	1	0	3
女	27	2015-06-25	1	2015	201502	#NULL!	季H3	4	1	1	0	3
男	27	2015-06-29	1	2015	201502	#NULL!	季H3	4	1	1	0	3
女	27	2015-09-19	1	2015	201503	#NULL!	季H3	4	1	1	0	3
男	27	2015-07-10	0	2015	201503	#NULL!	季H3	4	1	0	0	3
男	28	2015-10-09	3	2015	201504	#NULL!	季H3	4	1	3	0	3
男	28	2015-06-11	0	2015	201502	#NULL!	季H3	4	1	0	0	3
女	28	2015-06-21	0	2015	201502	#NULL!	季H3	4	1	0	0	3
女	28	2015-07-15	0	2015	201503	#NULL!	季H3	4	1	0	0	3
女	28	2015-06-12	4	2015	201502	#NULL!	季H3	4	1	4	1	3
女	29	2015-06-30	1	2015	201503	#NULL!	季H3	4	1	1	0	3
女	29	2015-07-15	1	2015	201503	#NULL!	季H3	4	1	1	0	3
女	29	2015-06-04	0	2015	201502	#NULL!	季H3	4	1	0	0	3
男	29	2015-06-29	0	2015	201502	#NULL!	季H3	4	1	0	0	3
男	29	2015-07-01	6	2015	201503	#NULL!	季H3	4	1	6	1	3
男	29	2015-06-20	4	2015	201502	#NULL!	季H3	4	1	4	1	3
男	29	2015-06-20	4	2015	201502	#NULL!	季H3	4	1	4	1	3
男	30	2015-02-26	2	2015	201501	#NULL!	季H3	4	1	2	0	3
女	30	2015-06-25	1	2015	201502	#NULL!	季H3	4	1	1	0	3
女	30	2015-06-25	0	2015	201502	#NULL!	季H3	4	1	0	0	3
男	30	2015-07-08	0	2015	201503	#NULL!	季H3	4	1	0	0	3
女	31	2015-07-26	1	2015	201503	#NULL!	季H3	4	1	1	0	3
男	31	2015-06-16	0	2015	201502	#NULL!	季H3	4	1	0	0	3
男	31	2015-06-15	4	2015	201502	#NULL!	季H3	4	1	4	1	3
男	32	2015-06-23	2	2015	201502	#NULL!	季H3	4	1	2	0	3
男	32	2015-06-30	2	2015	201503	#NULL!	季H3	4	1	2	0	3
男	32	2015-06-15	1	2015	201502	#NULL!	季H3	4	1	1	0	3
女	32	2015-06-18	1	2015	201502	#NULL!	季H3	4	1	1	0	3
女	32	2015-06-29	1	2015	201502	#NULL!	季H3	4	1	1	0	3
女	32	2015-01-22	0	2015	201501	#NULL!	季H3	4	1	0	0	3
女	32	2015-06-15	0	2015	201502	#NULL!	季H3	4	1	0	0	3
男	32	2015-06-28	0	2015	201502	#NULL!	季H3	4	1	0	0	3
男	32	2015-06-28	0	2015	201502	#NULL!	季H3	4	1	0	0	3
女	33	2015-06-02	2	2015	201502	#NULL!	季H3	4	1	2	0	3
男	33	2015-09-18	2	2015	201503	#NULL!	季H3	4	1	2	0	3
女	33	2015-07-08	1	2015	201503	#NULL!	季H3	4	1	1	0	3
女	33	2015-06-21	0	2015	201502	#NULL!	季H3	4	1	0	0	3
男	33	2015-06-22	0	2015	201502	#NULL!	季H3	4	1	0	0	3
女	33	2015-06-27	0	2015	201502	#NULL!	季H3	4	1	0	0	3
女	33	2015-09-20	5	2015	201503	#NULL!	季H3	4	1	5	1	3
女	34	2015-06-14	0	2015	201502	#NULL!	季H3	4	1	0	0	3
男	34	2015-06-25	0	2015	201502	#NULL!	季H3	4	1	0	0	3
女	34	2015-07-06	0	2015	201503	#NULL!	季H3	4	1	0	0	3
男	36	2015-01-28	0	2015	201501	#NULL!	季H3	4	1	0	0	3
男	37	2015-01-11	1	2015	201501	#NULL!	季H3	4	1	1	0	3
男	37	2015-06-29	0	2015	201502	#NULL!	季H3	4	1	0	0	3
女	39	2015-06-10	3	2015	201502	#NULL!	季H3	4	1	3	0	3
女	39	2015-06-10	2	2015	201502	#NULL!	季H3	4	1	2	0	3
女	39	2015-06-21	1	2015	201502	#NULL!	季H3	4	1	1	0	3
男	39	2015-03-02	0	2015	201501	#NULL!	季H3	4	1	0	0	3
男	40	2015-09-07	1	2015	201503	#NULL!	季H3	4	1	1	0	3
女	41	2015-07-06	3	2015	201503	#NULL!	季H3	4	1	3	0	3
男	42	2015-03-20	2	2015	201501	#NULL!	季H3	4	1	2	0	3
女	42	2015-02-01	0	2015	201501	#NULL!	季H3	4	1	0	0	3
男	42	2015-06-29	0	2015	201502	#NULL!	季H3	4	1	0	0	3
男	43	2015-03-19	7	2015	201501	#NULL!	季H3	4	1	7	1	3
男	44	2015-06-10	3	2015	201502	#NULL!	季H3	4	1	3	0	3
男	44	2015-06-13	1	2015	201502	#NULL!	季H3	4	1	1	0	3
男	44	2015-01-22	0	2015	201501	#NULL!	季H3	4	1	0	0	3
女	44	2015-06-15	0	2015	201502	#NULL!	季H3	4	1	0	0	3
男	44	2015-06-18	0	2015	201502	#NULL!	季H3	4	1	0	0	3
女	45	2015-08-04	2	2015	201503	#NULL!	季H3	4	1	2	0	3
女	45	2015-06-20	1	2015	201502	#NULL!	季H3	4	1	1	0	3
男	45	2015-07-02	0	2015	201503	#NULL!	季H3	4	1	0	0	3
男	45	2015-07-17	0	2015	201503	#NULL!	季H3	4	1	0	0	3
男	45	2015-06-22	9	2015	201503	#NULL!	季H3	4	1	9	1	3
女	46	2015-05-26	2	2015	201502	#NULL!	季H3	4	1	2	0	3
女	46	2015-06-13	1	2015	201502	#NULL!	季H3	4	1	1	0	3
男	47	2015-06-17	2	2015	201502	#NULL!	季H3	4	1	2	0	3
女	48	2015-06-18	1	2015	201502	#NULL!	季H3	4	1	1	0	3
女	48	2015-06-29	0	2015	201502	#NULL!	季H3	4	1	0	0	3
男	50	2015-07-03	2	2015	201503	#NULL!	季H3	4	1	2	0	3
男	50	2015-07-02	1	2015	201503	#NULL!	季H3	4	1	1	0	3
女	52	2015-06-30	1	2015	201503	#NULL!	季H3	4	1	1	0	3
男	52	2015-06-21	0	2015	201502	#NULL!	季H3	4	1	0	0	3
男	53	2015-06-16	1	2015	201502	#NULL!	季H3	4	1	1	0	3
男	54	2015-06-27	0	2015	201502	#NULL!	季H3	4	1	0	0	3
女	55	2015-07-20	1	2015	201503	#NULL!	季H3	4	1	1	0	3
男	55	2015-06-29	0	2015	201502	#NULL!	季H3	4	1	0	0	3
女	56	2015-06-16	1	2015	201502	#NULL!	季H3	4	1	1	0	3
女	56	2015-07-12	0	2015	201503	#NULL!	季H3	4	1	0	0	3
男	57	2015-06-15	0	2015	201502	#NULL!	季H3	4	1	0	0	3
女	59	2015-07-01	2	2015	201503	#NULL!	季H3	4	1	2	0	3
男	60	2015-03-04	2	2015	201501	#NULL!	季H3	4	1	2	0	4
女	60	2015-06-16	1	2015	201502	#NULL!	季H3	4	1	1	0	4
女	60	2015-06-17	0	2015	201502	#NULL!	季H3	4	1	0	0	4
女	62	2015-05-25	2	2015	201502	#NULL!	季H3	4	1	2	0	4
男	62	2015-06-23	1	2015	201502	#NULL!	季H3	4	1	1	0	4
男	62	2015-07-02	0	2015	201503	#NULL!	季H3	4	1	0	0	4
女	63	2015-04-25	0	2015	201502	#NULL!	季H3	4	1	0	0	4
男	64	2015-06-29	1	2015	201502	#NULL!	季H3	4	1	1	0	4
女	65	2015-04-10	1	2015	201502	#NULL!	季H3	4	1	1	0	4
男	65	2015-07-12	0	2015	201503	#NULL!	季H3	4	1	0	0	4
女	67	2015-07-07	2	2015	201503	#NULL!	季H3	4	1	2	0	4
女	67	2015-06-29	1	2015	201502	#NULL!	季H3	4	1	1	0	4
男	68	2015-07-03	3	2015	201503	#NULL!	季H3	4	1	3	0	4
男	68	2015-07-01	2	2015	201503	#NULL!	季H3	4	1	2	0	4
女	68	2015-06-09	0	2015	201502	#NULL!	季H3	4	1	0	0	4
男	69	2015-06-14	6	2015	201502	#NULL!	季H3	4	1	6	1	4
女	69	2015-07-01	5	2015	201503	#NULL!	季H3	4	1	5	1	4
男	72	2015-06-15	2	2015	201502	#NULL!	季H3	4	1	2	0	4
女	72	2015-06-26	1	2015	201502	#NULL!	季H3	4	1	1	0	4
男	72	2015-07-05	0	2015	201503	#NULL!	季H3	4	1	0	0	4
男	73	2015-02-16	0	2015	201501	#NULL!	季H3	4	1	0	0	4
女	76	2015-06-19	0	2015	201502	#NULL!	季H3	4	1	0	0	4
男	78	2015-06-18	2	2015	201502	#NULL!	季H3	4	1	2	0	4
男	80	2015-06-27	3	2015	201502	#NULL!	季H3	4	1	3	0	4
女	80	2015-06-22	4	2015	201502	#NULL!	季H3	4	1	4	1	4
女	81	2015-06-19	1	2015	201502	#NULL!	季H3	4	1	1	0	4
女	81	2015-06-24	0	2015	201502	#NULL!	季H3	4	1	0	0	4
男	82	2015-03-06	1	2015	201501	#NULL!	季H3	4	1	1	0	4
女	1	2014-01-17	3	2014	201401	#NULL!	B型	1	1	3	0	0
男	1	2014-01-18	3	2014	201401	#NULL!	B型	1	1	3	0	0
女	1	2014-01-24	3	2014	201401	#NULL!	B型	1	1	3	0	0
男	1	2014-04-24	3	2014	201402	#NULL!	B型	1	1	3	0	0
男	1	2014-01-14	2	2014	201401	#NULL!	B型	1	1	2	0	0
男	1	2014-02-17	2	2014	201401	#NULL!	B型	1	1	2	0	0
男	1	2014-01-16	1	2014	201401	#NULL!	B型	1	1	1	0	0
女	1	2014-03-04	1	2014	201401	#NULL!	B型	1	1	1	0	0
女	1	2014-01-07	0	2014	201401	#NULL!	B型	1	1	0	0	0
男	1	2014-01-17	0	2014	201401	#NULL!	B型	1	1	0	0	0
女	1	2014-01-28	9	2014	201401	#NULL!	B型	1	1	9	1	0
女	1	2014-01-27	8	2014	201401	#NULL!	B型	1	1	8	1	0
男	1	2014-01-17	7	2014	201401	#NULL!	B型	1	1	7	1	0
男	1	2014-01-27	7	2014	201401	#NULL!	B型	1	1	7	1	0
女	1	2014-01-29	6	2014	201401	#NULL!	B型	1	1	6	1	0
男	2	2014-02-13	3	2014	201401	#NULL!	B型	1	1	3	0	0
男	2	2014-02-09	1	2014	201401	#NULL!	B型	1	1	1	0	0
女	2	2014-02-10	1	2014	201401	#NULL!	B型	1	1	1	0	0
男	2	2014-02-21	1	2014	201401	#NULL!	B型	1	1	1	0	0
男	2	2014-01-29	7	2014	201401	#NULL!	B型	1	1	7	1	0
女	2	2014-01-27	4	2014	201401	#NULL!	B型	1	1	4	1	0
女	3	2014-01-20	3	2014	201401	#NULL!	B型	1	1	3	0	0
男	3	2014-01-22	3	2014	201401	#NULL!	B型	1	1	3	0	0
女	3	2014-02-07	3	2014	201401	#NULL!	B型	1	1	3	0	0
女	3	2014-02-03	2	2014	201401	#NULL!	B型	1	1	2	0	0
男	3	2014-02-13	2	2014	201401	#NULL!	B型	1	1	2	0	0
男	3	2014-02-23	2	2014	201401	#NULL!	B型	1	1	2	0	0
男	3	2014-01-23	1	2014	201401	#NULL!	B型	1	1	1	0	0
女	3	2014-02-17	1	2014	201401	#NULL!	B型	1	1	1	0	0
男	3	2014-02-24	1	2014	201401	#NULL!	B型	1	1	1	0	0
男	3	2014-02-28	1	2014	201401	#NULL!	B型	1	1	1	0	0
男	3	2014-01-30	0	2014	201401	#NULL!	B型	1	1	0	0	0
男	3	2014-02-19	0	2014	201401	#NULL!	B型	1	1	0	0	0
男	3	2014-01-23	4	2014	201401	#NULL!	B型	1	1	4	1	0
女	4	2014-01-17	3	2014	201401	#NULL!	B型	1	1	3	0	0
男	4	2014-01-20	3	2014	201401	#NULL!	B型	1	1	3	0	0
女	4	2014-01-26	3	2014	201401	#NULL!	B型	1	1	3	0	0
女	4	2014-01-12	2	2014	201401	#NULL!	B型	1	1	2	0	0
女	4	2014-01-14	2	2014	201401	#NULL!	B型	1	1	2	0	0
女	4	2014-01-18	2	2014	201401	#NULL!	B型	1	1	2	0	0
女	4	2014-02-15	2	2014	201401	#NULL!	B型	1	1	2	0	0
男	4	2014-02-19	2	2014	201401	#NULL!	B型	1	1	2	0	0
男	4	2014-03-03	2	2014	201401	#NULL!	B型	1	1	2	0	0
男	4	2014-03-19	2	2014	201401	#NULL!	B型	1	1	2	0	0
男	4	2014-01-02	1	2014	201401	#NULL!	B型	1	1	1	0	0
女	4	2014-02-09	1	2014	201401	#NULL!	B型	1	1	1	0	0
男	4	2014-02-17	1	2014	201401	#NULL!	B型	1	1	1	0	0
女	4	2014-02-25	1	2014	201401	#NULL!	B型	1	1	1	0	0
女	4	2014-03-13	1	2014	201401	#NULL!	B型	1	1	1	0	0
女	4	2014-03-14	1	2014	201401	#NULL!	B型	1	1	1	0	0
男	4	2014-03-16	1	2014	201401	#NULL!	B型	1	1	1	0	0
男	4	2014-12-30	1	2014	201404	#NULL!	B型	1	1	1	0	0
女	4	2014-01-05	0	2014	201401	#NULL!	B型	1	1	0	0	0
女	4	2014-12-25	0	2014	201404	#NULL!	B型	1	1	0	0	0
女	4	2014-01-24	4	2014	201401	#NULL!	B型	1	1	4	1	0
男	4	2014-01-24	4	2014	201401	#NULL!	B型	1	1	4	1	0
女	4	2014-02-24	4	2014	201401	#NULL!	B型	1	1	4	1	0
男	4	2014-02-28	4	2014	201401	#NULL!	B型	1	1	4	1	0
男	5	2014-01-14	3	2014	201401	#NULL!	B型	2	1	3	0	1
女	5	2014-01-11	2	2014	201401	#NULL!	B型	2	1	2	0	1
女	5	2014-01-11	2	2014	201401	#NULL!	B型	2	1	2	0	1
男	5	2014-01-13	2	2014	201401	#NULL!	B型	2	1	2	0	1
男	5	2014-02-08	2	2014	201401	#NULL!	B型	2	1	2	0	1
女	5	2014-02-16	2	2014	201401	#NULL!	B型	2	1	2	0	1
男	5	2014-02-18	2	2014	201401	#NULL!	B型	2	1	2	0	1
女	5	2014-02-26	2	2014	201401	#NULL!	B型	2	1	2	0	1
男	5	2014-03-16	2	2014	201401	#NULL!	B型	2	1	2	0	1
男	5	2014-03-17	2	2014	201401	#NULL!	B型	2	1	2	0	1
女	5	2014-05-18	2	2014	201402	#NULL!	B型	2	1	2	0	1
男	5	2014-06-23	2	2014	201402	#NULL!	B型	2	1	2	0	1
女	5	2014-01-05	1	2014	201401	#NULL!	B型	2	1	1	0	1
女	5	2014-01-12	1	2014	201401	#NULL!	B型	2	1	1	0	1
女	5	2014-01-13	1	2014	201401	#NULL!	B型	2	1	1	0	1
女	5	2014-01-17	1	2014	201401	#NULL!	B型	2	1	1	0	1
男	5	2014-01-17	1	2014	201401	#NULL!	B型	2	1	1	0	1
女	5	2014-02-09	1	2014	201401	#NULL!	B型	2	1	1	0	1
男	5	2014-02-17	1	2014	201401	#NULL!	B型	2	1	1	0	1
男	5	2014-02-20	1	2014	201401	#NULL!	B型	2	1	1	0	1
女	5	2014-03-02	1	2014	201401	#NULL!	B型	2	1	1	0	1
女	5	2014-03-03	1	2014	201401	#NULL!	B型	2	1	1	0	1
女	5	2014-03-09	1	2014	201401	#NULL!	B型	2	1	1	0	1
男	5	2014-03-16	1	2014	201401	#NULL!	B型	2	1	1	0	1
男	5	2014-03-16	1	2014	201401	#NULL!	B型	2	1	1	0	1
男	5	2014-10-29	1	2014	201404	#NULL!	B型	2	1	1	0	1
男	5	2014-01-17	0	2014	201401	#NULL!	B型	2	1	0	0	1
女	5	2014-01-23	0	2014	201401	#NULL!	B型	2	1	0	0	1
男	5	2014-02-09	0	2014	201401	#NULL!	B型	2	1	0	0	1
男	5	2014-02-28	0	2014	201401	#NULL!	B型	2	1	0	0	1
男	5	2014-03-21	0	2014	201401	#NULL!	B型	2	1	0	0	1
女	5	2014-01-12	4	2014	201401	#NULL!	B型	2	1	4	1	1
女	5	2014-01-13	4	2014	201401	#NULL!	B型	2	1	4	1	1
女	5	2014-01-23	4	2014	201401	#NULL!	B型	2	1	4	1	1
女	6	2014-01-05	2	2014	201401	#NULL!	B型	2	1	2	0	1
女	6	2014-03-12	2	2014	201401	#NULL!	B型	2	1	2	0	1
男	6	2014-10-20	2	2014	201404	#NULL!	B型	2	1	2	0	1
女	6	2014-01-07	1	2014	201401	#NULL!	B型	2	1	1	0	1
男	6	2014-01-12	1	2014	201401	#NULL!	B型	2	1	1	0	1
男	6	2014-01-13	1	2014	201401	#NULL!	B型	2	1	1	0	1
男	6	2014-01-19	1	2014	201401	#NULL!	B型	2	1	1	0	1
女	6	2014-01-23	1	2014	201401	#NULL!	B型	2	1	1	0	1
女	6	2014-02-18	1	2014	201401	#NULL!	B型	2	1	1	0	1
女	6	2014-03-20	1	2014	201401	#NULL!	B型	2	1	1	0	1
男	6	2014-04-27	1	2014	201402	#NULL!	B型	2	1	1	0	1
女	6	2014-09-21	1	2014	201403	#NULL!	B型	2	1	1	0	1
男	6	2014-12-04	1	2014	201404	#NULL!	B型	2	1	1	0	1
男	6	2014-12-16	1	2014	201404	#NULL!	B型	2	1	1	0	1
女	6	2014-01-06	0	2014	201401	#NULL!	B型	2	1	0	0	1
男	6	2014-01-09	0	2014	201401	#NULL!	B型	2	1	0	0	1
男	6	2014-02-26	0	2014	201401	#NULL!	B型	2	1	0	0	1
女	6	2014-10-30	0	2014	201404	#NULL!	B型	2	1	0	0	1
女	6	2014-12-02	0	2014	201404	#NULL!	B型	2	1	0	0	1
女	6	2014-03-06	5	2014	201401	#NULL!	B型	2	1	5	1	1
女	7	2014-02-10	3	2014	201401	#NULL!	B型	2	1	3	0	1
女	7	2014-01-06	2	2014	201401	#NULL!	B型	2	1	2	0	1
女	7	2014-01-07	2	2014	201401	#NULL!	B型	2	1	2	0	1
男	7	2014-01-11	2	2014	201401	#NULL!	B型	2	1	2	0	1
男	7	2014-01-26	2	2014	201401	#NULL!	B型	2	1	2	0	1
男	7	2014-03-16	2	2014	201401	#NULL!	B型	2	1	2	0	1
男	7	2013-12-31	1	2014	201401	#NULL!	B型	2	1	1	0	1
男	7	2014-01-07	1	2014	201401	#NULL!	B型	2	1	1	0	1
男	7	2014-01-17	1	2014	201401	#NULL!	B型	2	1	1	0	1
男	7	2014-02-28	1	2014	201401	#NULL!	B型	2	1	1	0	1
男	7	2014-03-03	1	2014	201401	#NULL!	B型	2	1	1	0	1
女	7	2014-05-21	1	2014	201402	#NULL!	B型	2	1	1	0	1
女	7	2014-01-13	0	2014	201401	#NULL!	B型	2	1	0	0	1
女	7	2014-01-27	6	2014	201401	#NULL!	B型	2	1	6	1	1
男	8	2014-01-13	2	2014	201401	#NULL!	B型	2	1	2	0	1
男	8	2014-12-27	2	2014	201404	#NULL!	B型	2	1	2	0	1
男	8	2014-01-06	1	2014	201401	#NULL!	B型	2	1	1	0	1
女	8	2014-01-09	1	2014	201401	#NULL!	B型	2	1	1	0	1
男	8	2014-01-14	1	2014	201401	#NULL!	B型	2	1	1	0	1
女	8	2014-01-18	1	2014	201401	#NULL!	B型	2	1	1	0	1
男	8	2014-02-12	1	2014	201401	#NULL!	B型	2	1	1	0	1
女	8	2014-03-10	1	2014	201401	#NULL!	B型	2	1	1	0	1
男	8	2014-01-29	6	2014	201401	#NULL!	B型	2	1	6	1	1
女	9	2014-01-14	2	2014	201401	#NULL!	B型	2	1	2	0	1
男	9	2014-01-14	2	2014	201401	#NULL!	B型	2	1	2	0	1
男	9	2014-01-05	1	2014	201401	#NULL!	B型	2	1	1	0	1
女	9	2014-01-06	1	2014	201401	#NULL!	B型	2	1	1	0	1
男	9	2014-01-09	1	2014	201401	#NULL!	B型	2	1	1	0	1
女	9	2014-01-14	1	2014	201401	#NULL!	B型	2	1	1	0	1
男	9	2014-03-11	1	2014	201401	#NULL!	B型	2	1	1	0	1
男	10	2014-01-11	2	2014	201401	#NULL!	B型	3	1	2	0	1
男	10	2014-03-23	2	2014	201401	#NULL!	B型	3	1	2	0	1
男	10	2014-01-05	1	2014	201401	#NULL!	B型	3	1	1	0	1
女	10	2014-10-22	1	2014	201404	#NULL!	B型	3	1	1	0	1
男	10	2014-02-10	0	2014	201401	#NULL!	B型	3	1	0	0	1
女	11	2014-02-11	2	2014	201401	#NULL!	B型	3	1	2	0	1
男	11	2014-01-27	1	2014	201401	#NULL!	B型	3	1	1	0	1
女	11	2014-02-21	1	2014	201401	#NULL!	B型	3	1	1	0	1
男	11	2014-02-09	0	2014	201401	#NULL!	B型	3	1	0	0	1
男	12	2014-01-04	2	2014	201401	#NULL!	B型	3	1	2	0	1
男	12	2014-02-26	2	2014	201401	#NULL!	B型	3	1	2	0	1
女	12	2014-01-30	1	2014	201401	#NULL!	B型	3	1	1	0	1
男	12	2014-01-08	0	2014	201401	#NULL!	B型	3	1	0	0	1
女	12	2014-01-12	0	2014	201401	#NULL!	B型	3	1	0	0	1
女	12	2014-03-28	0	2014	201401	#NULL!	B型	3	1	0	0	1
男	12	2014-01-09	4	2014	201401	#NULL!	B型	3	1	4	1	1
女	13	2014-02-26	2	2014	201401	#NULL!	B型	3	1	2	0	1
男	13	2014-01-01	1	2014	201401	#NULL!	B型	3	1	1	0	1
女	13	2014-01-07	1	2014	201401	#NULL!	B型	3	1	1	0	1
男	13	2014-01-08	1	2014	201401	#NULL!	B型	3	1	1	0	1
男	13	2014-03-11	1	2014	201401	#NULL!	B型	3	1	1	0	1
男	13	2014-03-17	1	2014	201401	#NULL!	B型	3	1	1	0	1
男	14	2014-03-10	3	2014	201401	#NULL!	B型	3	1	3	0	1
女	14	2014-01-07	1	2014	201401	#NULL!	B型	3	1	1	0	1
男	14	2014-02-26	1	2014	201401	#NULL!	B型	3	1	1	0	1
男	15	2014-02-25	3	2014	201401	#NULL!	B型	3	1	3	0	2
男	19	2014-01-01	2	2014	201401	#NULL!	B型	3	1	2	0	2
女	19	2014-01-30	8	2014	201401	#NULL!	B型	3	1	8	1	2
女	23	2014-01-22	2	2014	201401	#NULL!	B型	3	1	2	0	2
女	26	2014-01-21	2	2014	201401	#NULL!	B型	4	1	2	0	3
女	27	2014-01-21	0	2014	201401	#NULL!	B型	4	1	0	0	3
女	27	2014-02-19	0	2014	201401	#NULL!	B型	4	1	0	0	3
女	28	2014-04-01	1	2014	201402	#NULL!	B型	4	1	1	0	3
女	36	2014-02-08	0	2014	201401	#NULL!	B型	4	1	0	0	3
女	36	2014-03-01	8	2014	201401	#NULL!	B型	4	1	8	1	3
女	37	2014-01-19	3	2014	201401	#NULL!	B型	4	1	3	0	3
男	39	2014-04-07	3	2014	201402	#NULL!	B型	4	1	3	0	3
男	42	2014-01-25	3	2014	201401	#NULL!	B型	4	1	3	0	3
女	43	2014-02-05	0	2014	201401	#NULL!	B型	4	1	0	0	3
男	45	2014-01-28	1	2014	201401	#NULL!	B型	4	1	1	0	3
女	50	2014-01-26	1	2014	201401	#NULL!	B型	4	1	1	0	3
女	55	2014-03-04	1	2014	201401	#NULL!	B型	4	1	1	0	3
女	56	2014-02-12	2	2014	201401	#NULL!	B型	4	1	2	0	3
女	63	2014-06-06	0	2014	201402	#NULL!	B型	4	1	0	0	4
男	69	2014-04-06	0	2014	201402	#NULL!	B型	4	1	0	0	4
男	1	2014-03-10	2	2014	201401	#NULL!	B型	1	1	2	0	0
男	1	2014-01-06	1	2014	201401	#NULL!	B型	1	1	1	0	0
男	1	2014-03-06	5	2014	201401	#NULL!	B型	1	1	5	1	0
男	2	2014-03-05	0	2014	201401	#NULL!	B型	1	1	0	0	0
男	3	2014-01-03	3	2014	201401	#NULL!	B型	1	1	3	0	0
男	3	2014-01-05	2	2014	201401	#NULL!	B型	1	1	2	0	0
男	3	2014-04-15	1	2014	201402	#NULL!	B型	1	1	1	0	0
男	3	2014-02-27	0	2014	201401	#NULL!	B型	1	1	0	0	0
女	4	2014-01-03	3	2014	201401	#NULL!	B型	1	1	3	0	0
男	4	2014-03-09	2	2014	201401	#NULL!	B型	1	1	2	0	0
男	4	2014-04-09	5	2014	201402	#NULL!	B型	1	1	5	1	0
女	5	2014-03-01	3	2014	201401	#NULL!	B型	2	1	3	0	1
男	5	2014-07-07	1	2014	201403	#NULL!	B型	2	1	1	0	1
男	5	2014-01-07	4	2014	201401	#NULL!	B型	2	1	4	1	1
男	6	2014-01-02	2	2014	201401	#NULL!	B型	2	1	2	0	1
男	6	2014-01-06	2	2014	201401	#NULL!	B型	2	1	2	0	1
男	6	2014-01-06	2	2014	201401	#NULL!	B型	2	1	2	0	1
女	6	2014-01-11	1	2014	201401	#NULL!	B型	2	1	1	0	1
女	6	2014-03-17	0	2014	201401	#NULL!	B型	2	1	0	0	1
男	6	2014-01-05	5	2014	201401	#NULL!	B型	2	1	5	1	1
女	7	2014-01-06	5	2014	201401	#NULL!	B型	2	1	5	1	1
男	8	2014-02-07	0	2014	201401	#NULL!	B型	2	1	0	0	1
女	10	2014-03-10	1	2014	201401	#NULL!	B型	3	1	1	0	1
女	16	2014-12-11	7	2014	201404	#NULL!	B型	3	1	7	1	2
男	21	2014-02-10	1	2014	201401	#NULL!	B型	3	1	1	0	2
男	27	2014-03-10	5	2014	201401	#NULL!	B型	4	1	5	1	3
男	31	2014-01-05	7	2014	201401	#NULL!	B型	4	1	7	1	3
女	33	2014-02-07	3	2014	201401	#NULL!	B型	4	1	3	0	3
男	43	2014-01-13	1	2014	201401	#NULL!	B型	4	1	1	0	3
女	43	2014-03-06	4	2014	201401	#NULL!	B型	4	1	4	1	3
男	45	2014-02-13	2	2014	201401	#NULL!	B型	4	1	2	0	3
男	50	2014-02-27	0	2014	201401	#NULL!	B型	4	1	0	0	3
女	55	2014-03-12	5	2014	201401	#NULL!	B型	4	1	5	1	3
男	60	2014-04-27	1	2014	201402	#NULL!	B型	4	1	1	0	4
男	62	2014-07-11	1	2014	201403	#NULL!	B型	4	1	1	0	4
女	64	2014-07-05	3	2014	201403	#NULL!	B型	4	1	3	0	4
男	71	2014-12-16	0	2014	201404	#NULL!	B型	4	1	0	0	4
女	76	2014-03-17	1	2014	201401	#NULL!	B型	4	1	1	0	4
男	85	2014-02-04	3	2014	201401	#NULL!	B型	4	1	3	0	4
男	48	2014-01-17	3	2014	201401	#NULL!	混合型	4	1	3	0	3
男	0.33	2014-08-04	1	2014	201403	#NULL!	季H3	0	1	1	0	0
男	0.42	2014-07-15	3	2014	201403	#NULL!	季H3	0	1	3	0	0
女	0.42	2014-07-12	2	2014	201403	#NULL!	季H3	0	1	2	0	0
女	0.42	2014-08-06	1	2014	201403	#NULL!	季H3	0	1	1	0	0
男	0.5	2014-08-07	1	2014	201403	#NULL!	季H3	0	1	1	0	0
男	0.67	2014-07-14	3	2014	201403	#NULL!	季H3	0	1	3	0	0
男	0.67	2014-08-18	0	2014	201403	#NULL!	季H3	0	1	0	0	0
女	0.83	2014-07-12	3	2014	201403	#NULL!	季H3	0	1	3	0	0
男	1	2014-07-04	3	2014	201403	#NULL!	季H3	1	1	3	0	0
男	1	2014-07-09	3	2014	201403	#NULL!	季H3	1	1	3	0	0
男	1	2014-07-12	3	2014	201403	#NULL!	季H3	1	1	3	0	0
男	1	2014-07-20	3	2014	201403	#NULL!	季H3	1	1	3	0	0
男	1	2014-06-24	2	2014	201402	#NULL!	季H3	1	1	2	0	0
男	1	2014-07-04	2	2014	201403	#NULL!	季H3	1	1	2	0	0
男	1	2014-07-07	2	2014	201403	#NULL!	季H3	1	1	2	0	0
女	1	2014-07-29	2	2014	201403	#NULL!	季H3	1	1	2	0	0
女	1	2014-08-13	2	2014	201403	#NULL!	季H3	1	1	2	0	0
女	1	2014-06-14	1	2014	201402	#NULL!	季H3	1	1	1	0	0
男	1	2014-06-23	1	2014	201402	#NULL!	季H3	1	1	1	0	0
男	1	2014-07-07	1	2014	201403	#NULL!	季H3	1	1	1	0	0
男	1	2014-07-07	1	2014	201403	#NULL!	季H3	1	1	1	0	0
男	1	2014-07-13	1	2014	201403	#NULL!	季H3	1	1	1	0	0
男	1	2014-07-14	1	2014	201403	#NULL!	季H3	1	1	1	0	0
女	1	2014-07-20	1	2014	201403	#NULL!	季H3	1	1	1	0	0
男	1	2014-07-21	1	2014	201403	#NULL!	季H3	1	1	1	0	0
男	1	2014-07-23	1	2014	201403	#NULL!	季H3	1	1	1	0	0
女	1	2014-08-27	1	2014	201403	#NULL!	季H3	1	1	1	0	0
男	1	2014-01-24	0	2014	201401	#NULL!	季H3	1	1	0	0	0
男	1	2014-07-03	0	2014	201403	#NULL!	季H3	1	1	0	0	0
男	1	2014-07-12	0	2014	201403	#NULL!	季H3	1	1	0	0	0
女	1	2014-07-15	0	2014	201403	#NULL!	季H3	1	1	0	0	0
男	1	2014-07-29	5	2014	201403	#NULL!	季H3	1	1	5	1	0
男	1	2014-09-24	5	2014	201403	#NULL!	季H3	1	1	5	1	0
女	2	2014-07-19	3	2014	201403	#NULL!	季H3	1	1	3	0	0
男	2	2014-06-19	2	2014	201402	#NULL!	季H3	1	1	2	0	0
男	2	2014-07-12	2	2014	201403	#NULL!	季H3	1	1	2	0	0
男	2	2014-09-30	2	2014	201404	#NULL!	季H3	1	1	2	0	0
女	2	2014-06-24	1	2014	201402	#NULL!	季H3	1	1	1	0	0
男	2	2014-07-06	1	2014	201403	#NULL!	季H3	1	1	1	0	0
男	2	2014-07-14	1	2014	201403	#NULL!	季H3	1	1	1	0	0
男	2	2014-07-18	1	2014	201403	#NULL!	季H3	1	1	1	0	0
男	2	2014-08-11	1	2014	201403	#NULL!	季H3	1	1	1	0	0
男	2	2014-09-03	1	2014	201403	#NULL!	季H3	1	1	1	0	0
男	2	2014-09-11	1	2014	201403	#NULL!	季H3	1	1	1	0	0
女	2	2014-12-29	1	2014	201404	#NULL!	季H3	1	1	1	0	0
女	2	2014-07-06	0	2014	201403	#NULL!	季H3	1	1	0	0	0
男	2	2014-07-15	0	2014	201403	#NULL!	季H3	1	1	0	0	0
男	2	2014-07-22	0	2014	201403	#NULL!	季H3	1	1	0	0	0
女	2	2014-09-02	0	2014	201403	#NULL!	季H3	1	1	0	0	0
男	2	2014-07-25	9	2014	201403	#NULL!	季H3	1	1	9	1	0
男	2	2014-06-14	4	2014	201402	#NULL!	季H3	1	1	4	1	0
男	3	2014-07-16	3	2014	201403	#NULL!	季H3	1	1	3	0	0
女	3	2014-07-18	3	2014	201403	#NULL!	季H3	1	1	3	0	0
男	3	2014-02-02	2	2014	201401	#NULL!	季H3	1	1	2	0	0
女	3	2014-06-18	2	2014	201402	#NULL!	季H3	1	1	2	0	0
男	3	2014-07-01	2	2014	201403	#NULL!	季H3	1	1	2	0	0
女	3	2014-07-05	2	2014	201403	#NULL!	季H3	1	1	2	0	0
女	3	2014-07-14	2	2014	201403	#NULL!	季H3	1	1	2	0	0
男	3	2014-08-05	2	2014	201403	#NULL!	季H3	1	1	2	0	0
男	3	2014-12-27	2	2014	201404	#NULL!	季H3	1	1	2	0	0
女	3	2014-03-24	1	2014	201401	#NULL!	季H3	1	1	1	0	0
男	3	2014-06-08	1	2014	201402	#NULL!	季H3	1	1	1	0	0
男	3	2014-06-26	1	2014	201402	#NULL!	季H3	1	1	1	0	0
男	3	2014-06-26	1	2014	201402	#NULL!	季H3	1	1	1	0	0
女	3	2014-06-29	1	2014	201402	#NULL!	季H3	1	1	1	0	0
男	3	2014-06-30	1	2014	201402	#NULL!	季H3	1	1	1	0	0
女	3	2014-07-01	1	2014	201402	#NULL!	季H3	1	1	1	0	0
女	3	2014-07-01	1	2014	201402	#NULL!	季H3	1	1	1	0	0
女	3	2014-07-07	1	2014	201403	#NULL!	季H3	1	1	1	0	0
女	3	2014-07-13	1	2014	201403	#NULL!	季H3	1	1	1	0	0
女	3	2014-07-13	1	2014	201403	#NULL!	季H3	1	1	1	0	0
男	3	2014-07-14	1	2014	201403	#NULL!	季H3	1	1	1	0	0
女	3	2014-07-16	1	2014	201403	#NULL!	季H3	1	1	1	0	0
女	3	2014-07-16	1	2014	201403	#NULL!	季H3	1	1	1	0	0
男	3	2014-07-21	1	2014	201403	#NULL!	季H3	1	1	1	0	0
女	3	2014-07-22	1	2014	201403	#NULL!	季H3	1	1	1	0	0
男	3	2014-07-23	1	2014	201403	#NULL!	季H3	1	1	1	0	0
男	3	2014-07-29	1	2014	201403	#NULL!	季H3	1	1	1	0	0
男	3	2014-08-04	1	2014	201403	#NULL!	季H3	1	1	1	0	0
男	3	2014-08-06	1	2014	201403	#NULL!	季H3	1	1	1	0	0
男	3	2014-09-29	1	2014	201403	#NULL!	季H3	1	1	1	0	0
男	3	2014-12-28	1	2014	201404	#NULL!	季H3	1	1	1	0	0
男	3	2014-06-09	0	2014	201402	#NULL!	季H3	1	1	0	0	0
男	3	2014-07-11	0	2014	201403	#NULL!	季H3	1	1	0	0	0
男	3	2014-07-12	0	2014	201403	#NULL!	季H3	1	1	0	0	0
女	3	2014-09-04	0	2014	201403	#NULL!	季H3	1	1	0	0	0
男	4	2014-05-30	3	2014	201402	#NULL!	季H3	1	1	33	0	0
女	4	2014-02-21	3	2014	201401	#NULL!	季H3	1	1	3	0	0
女	4	2014-02-26	2	2014	201401	#NULL!	季H3	1	1	2	0	0
男	4	2014-07-07	2	2014	201403	#NULL!	季H3	1	1	2	0	0
女	4	2014-07-12	2	2014	201403	#NULL!	季H3	1	1	2	0	0
男	4	2014-12-02	2	2014	201404	#NULL!	季H3	1	1	2	0	0
男	4	2014-04-08	1	2014	201402	#NULL!	季H3	1	1	1	0	0
男	4	2014-05-03	1	2014	201402	#NULL!	季H3	1	1	1	0	0
男	4	2014-07-05	1	2014	201403	#NULL!	季H3	1	1	1	0	0
男	4	2014-07-07	1	2014	201403	#NULL!	季H3	1	1	1	0	0
男	4	2014-07-17	1	2014	201403	#NULL!	季H3	1	1	1	0	0
女	4	2014-07-20	1	2014	201403	#NULL!	季H3	1	1	1	0	0
男	4	2014-08-13	1	2014	201403	#NULL!	季H3	1	1	1	0	0
女	4	2014-10-01	1	2014	201404	#NULL!	季H3	1	1	1	0	0
男	4	2014-03-09	0	2014	201401	#NULL!	季H3	1	1	0	0	0
男	4	2014-07-06	0	2014	201403	#NULL!	季H3	1	1	0	0	0
男	4	2014-08-12	0	2014	201403	#NULL!	季H3	1	1	0	0	0
男	4	2014-06-18	5	2014	201402	#NULL!	季H3	1	1	5	1	0
男	5	2014-05-07	2	2014	201402	#NULL!	季H3	2	1	2	0	1
男	5	2014-05-21	2	2014	201402	#NULL!	季H3	2	1	2	0	1
男	5	2014-06-24	2	2014	201402	#NULL!	季H3	2	1	2	0	1
女	5	2014-06-30	2	2014	201402	#NULL!	季H3	2	1	2	0	1
男	5	2014-04-10	1	2014	201402	#NULL!	季H3	2	1	1	0	1
男	5	2014-06-03	1	2014	201402	#NULL!	季H3	2	1	1	0	1
男	5	2014-06-25	1	2014	201402	#NULL!	季H3	2	1	1	0	1
女	5	2014-07-05	1	2014	201403	#NULL!	季H3	2	1	1	0	1
女	5	2014-07-13	1	2014	201403	#NULL!	季H3	2	1	1	0	1
女	5	2014-07-27	1	2014	201403	#NULL!	季H3	2	1	1	0	1
男	5	2014-07-27	1	2014	201403	#NULL!	季H3	2	1	1	0	1
男	5	2014-07-28	1	2014	201403	#NULL!	季H3	2	1	1	0	1
男	5	2014-07-29	1	2014	201403	#NULL!	季H3	2	1	1	0	1
女	5	2014-09-27	1	2014	201403	#NULL!	季H3	2	1	1	0	1
男	5	2014-05-13	0	2014	201402	#NULL!	季H3	2	1	0	0	1
女	5	2014-05-29	0	2014	201402	#NULL!	季H3	2	1	0	0	1
男	5	2014-07-19	0	2014	201403	#NULL!	季H3	2	1	0	0	1
男	5	2014-09-03	0	2014	201403	#NULL!	季H3	2	1	0	0	1
男	6	2014-06-16	3	2014	201402	#NULL!	季H3	2	1	3	0	1
男	6	2014-07-08	3	2014	201403	#NULL!	季H3	2	1	3	0	1
女	6	2014-04-23	2	2014	201402	#NULL!	季H3	2	1	2	0	1
男	6	2014-05-17	2	2014	201402	#NULL!	季H3	2	1	2	0	1
女	6	2014-06-30	2	2014	201402	#NULL!	季H3	2	1	2	0	1
男	6	2014-08-27	2	2014	201403	#NULL!	季H3	2	1	2	0	1
女	6	2014-03-17	1	2014	201401	#NULL!	季H3	2	1	1	0	1
男	6	2014-05-11	1	2014	201402	#NULL!	季H3	2	1	1	0	1
女	6	2014-06-01	1	2014	201402	#NULL!	季H3	2	1	1	0	1
女	6	2014-06-11	1	2014	201402	#NULL!	季H3	2	1	1	0	1
女	6	2014-06-12	1	2014	201402	#NULL!	季H3	2	1	1	0	1
女	6	2014-06-16	1	2014	201402	#NULL!	季H3	2	1	1	0	1
男	6	2014-07-01	1	2014	201402	#NULL!	季H3	2	1	1	0	1
男	6	2014-07-01	1	2014	201402	#NULL!	季H3	2	1	1	0	1
女	6	2014-07-21	1	2014	201403	#NULL!	季H3	2	1	1	0	1
男	6	2014-08-03	1	2014	201403	#NULL!	季H3	2	1	1	0	1
女	6	2014-12-29	1	2014	201404	#NULL!	季H3	2	1	1	0	1
女	6	2014-12-29	1	2014	201404	#NULL!	季H3	2	1	1	0	1
男	6	2014-06-27	0	2014	201402	#NULL!	季H3	2	1	0	0	1
女	6	2014-07-03	0	2014	201403	#NULL!	季H3	2	1	0	0	1
男	6	2014-07-23	0	2014	201403	#NULL!	季H3	2	1	0	0	1
女	6	2014-07-28	0	2014	201403	#NULL!	季H3	2	1	0	0	1
女	6	2014-10-24	0	2014	201404	#NULL!	季H3	2	1	0	0	1
男	7	2014-06-16	3	2014	201402	#NULL!	季H3	2	1	3	0	1
男	7	2014-07-07	3	2014	201403	#NULL!	季H3	2	1	3	0	1
男	7	2014-06-04	2	2014	201402	#NULL!	季H3	2	1	2	0	1
女	7	2014-06-15	2	2014	201402	#NULL!	季H3	2	1	2	0	1
女	7	2014-07-12	2	2014	201403	#NULL!	季H3	2	1	2	0	1
女	7	2014-07-15	2	2014	201403	#NULL!	季H3	2	1	2	0	1
男	7	2014-06-05	1	2014	201402	#NULL!	季H3	2	1	1	0	1
女	7	2014-06-10	1	2014	201402	#NULL!	季H3	2	1	1	0	1
女	7	2014-06-12	1	2014	201402	#NULL!	季H3	2	1	1	0	1
男	7	2014-06-12	1	2014	201402	#NULL!	季H3	2	1	1	0	1
女	7	2014-06-15	1	2014	201402	#NULL!	季H3	2	1	1	0	1
女	7	2014-06-23	1	2014	201402	#NULL!	季H3	2	1	1	0	1
男	7	2014-06-30	1	2014	201402	#NULL!	季H3	2	1	1	0	1
女	7	2014-07-06	1	2014	201403	#NULL!	季H3	2	1	1	0	1
女	7	2014-07-06	1	2014	201403	#NULL!	季H3	2	1	1	0	1
男	7	2014-07-07	1	2014	201403	#NULL!	季H3	2	1	1	0	1
男	7	2014-07-10	1	2014	201403	#NULL!	季H3	2	1	1	0	1
女	7	2014-07-17	1	2014	201403	#NULL!	季H3	2	1	1	0	1
女	7	2014-07-21	1	2014	201403	#NULL!	季H3	2	1	1	0	1
女	8	2014-04-05	2	2014	201402	#NULL!	季H3	2	1	2	0	1
男	8	2014-06-10	2	2014	201402	#NULL!	季H3	2	1	2	0	1
女	8	2014-06-26	2	2014	201402	#NULL!	季H3	2	1	2	0	1
女	8	2014-06-26	2	2014	201402	#NULL!	季H3	2	1	2	0	1
女	8	2014-07-07	2	2014	201403	#NULL!	季H3	2	1	2	0	1
男	8	2014-07-12	2	2014	201403	#NULL!	季H3	2	1	2	0	1
女	8	2014-07-25	2	2014	201403	#NULL!	季H3	2	1	2	0	1
男	8	2014-06-30	1	2014	201402	#NULL!	季H3	2	1	1	0	1
男	8	2014-07-02	1	2014	201403	#NULL!	季H3	2	1	1	0	1
女	8	2014-12-03	1	2014	201404	#NULL!	季H3	2	1	1	0	1
女	8	2014-06-10	0	2014	201402	#NULL!	季H3	2	1	0	0	1
女	8	2014-06-22	0	2014	201402	#NULL!	季H3	2	1	0	0	1
女	8	2014-06-26	0	2014	201402	#NULL!	季H3	2	1	0	0	1
男	8	2014-07-03	0	2014	201403	#NULL!	季H3	2	1	0	0	1
女	8	2014-07-14	0	2014	201403	#NULL!	季H3	2	1	0	0	1
男	8	2014-07-23	0	2014	201403	#NULL!	季H3	2	1	0	0	1
男	8	2014-10-14	0	2014	201404	#NULL!	季H3	2	1	0	0	1
女	9	2014-06-19	3	2014	201402	#NULL!	季H3	2	1	3	0	1
男	9	2014-06-30	3	2014	201402	#NULL!	季H3	2	1	3	0	1
女	9	2014-07-14	3	2014	201403	#NULL!	季H3	2	1	3	0	1
女	9	2014-04-12	2	2014	201402	#NULL!	季H3	2	1	2	0	1
男	9	2014-05-17	2	2014	201402	#NULL!	季H3	2	1	2	0	1
女	9	2014-06-09	2	2014	201402	#NULL!	季H3	2	1	2	0	1
男	9	2014-06-11	2	2014	201402	#NULL!	季H3	2	1	2	0	1
男	9	2014-07-20	2	2014	201403	#NULL!	季H3	2	1	2	0	1
男	9	2014-03-24	1	2014	201401	#NULL!	季H3	2	1	1	0	1
男	9	2014-03-27	1	2014	201401	#NULL!	季H3	2	1	1	0	1
男	9	2014-05-19	1	2014	201402	#NULL!	季H3	2	1	1	0	1
男	9	2014-06-23	1	2014	201402	#NULL!	季H3	2	1	1	0	1
女	9	2014-06-27	1	2014	201402	#NULL!	季H3	2	1	1	0	1
男	9	2014-07-02	1	2014	201403	#NULL!	季H3	2	1	1	0	1
女	9	2014-07-10	1	2014	201403	#NULL!	季H3	2	1	1	0	1
男	9	2014-03-27	0	2014	201401	#NULL!	季H3	2	1	0	0	1
男	9	2014-04-25	0	2014	201402	#NULL!	季H3	2	1	0	0	1
男	9	2014-06-23	0	2014	201402	#NULL!	季H3	2	1	0	0	1
男	9	2014-07-29	0	2014	201403	#NULL!	季H3	2	1	0	0	1
女	10	2014-06-15	3	2014	201402	#NULL!	季H3	3	1	3	0	1
男	10	2014-07-07	3	2014	201403	#NULL!	季H3	3	1	3	0	1
男	10	2014-07-20	3	2014	201403	#NULL!	季H3	3	1	3	0	1
男	10	2014-08-07	3	2014	201403	#NULL!	季H3	3	1	3	0	1
男	10	2014-07-09	2	2014	201403	#NULL!	季H3	3	1	2	0	1
男	10	2014-07-01	1	2014	201402	#NULL!	季H3	3	1	1	0	1
男	10	2014-07-13	1	2014	201403	#NULL!	季H3	3	1	1	0	1
男	10	2014-08-18	1	2014	201403	#NULL!	季H3	3	1	1	0	1
女	10	2014-10-27	1	2014	201404	#NULL!	季H3	3	1	1	0	1
男	10	2014-03-24	0	2014	201401	#NULL!	季H3	3	1	0	0	1
男	10	2014-05-31	0	2014	201402	#NULL!	季H3	3	1	0	0	1
男	10	2014-07-17	0	2014	201403	#NULL!	季H3	3	1	0	0	1
男	10	2014-08-01	0	2014	201403	#NULL!	季H3	3	1	0	0	1
男	10	2014-10-30	0	2014	201404	#NULL!	季H3	3	1	0	0	1
男	10	2014-12-22	0	2014	201404	#NULL!	季H3	3	1	0	0	1
女	10	2014-07-18	4	2014	201403	#NULL!	季H3	3	1	4	1	1
女	10.1	2014-08-16	2	2014	201403	#NULL!	季H3	3	1	2	0	1
男	10.1	2014-06-30	1	2014	201402	#NULL!	季H3	3	1	1	0	1
男	11	2014-06-30	3	2014	201402	#NULL!	季H3	3	1	3	0	1
女	11	2014-01-14	2	2014	201401	#NULL!	季H3	3	1	2	0	1
女	11	2014-07-09	2	2014	201403	#NULL!	季H3	3	1	2	0	1
男	11	2014-10-04	2	2014	201404	#NULL!	季H3	3	1	2	0	1
男	11	2014-01-23	1	2014	201401	#NULL!	季H3	3	1	1	0	1
男	11	2014-06-22	1	2014	201402	#NULL!	季H3	3	1	1	0	1
女	11	2014-07-15	1	2014	201403	#NULL!	季H3	3	1	1	0	1
女	11	2014-07-27	1	2014	201403	#NULL!	季H3	3	1	1	0	1
男	11	2014-07-28	1	2014	201403	#NULL!	季H3	3	1	1	0	1
女	11	2014-06-27	0	2014	201402	#NULL!	季H3	3	1	0	0	1
男	11	2014-07-18	0	2014	201403	#NULL!	季H3	3	1	0	0	1
男	11	2014-11-09	0	2014	201404	#NULL!	季H3	3	1	0	0	1
男	12	2014-07-09	2	2014	201403	#NULL!	季H3	3	1	2	0	1
女	12	2014-07-18	2	2014	201403	#NULL!	季H3	3	1	2	0	1
女	12	2014-07-30	2	2014	201403	#NULL!	季H3	3	1	2	0	1
男	12	2014-06-07	1	2014	201402	#NULL!	季H3	3	1	1	0	1
女	12	2014-01-10	0	2014	201401	#NULL!	季H3	3	1	0	0	1
女	12	2014-07-14	0	2014	201403	#NULL!	季H3	3	1	0	0	1
女	12	2014-07-04	5	2014	201403	#NULL!	季H3	3	1	5	1	1
女	13	2014-07-07	3	2014	201403	#NULL!	季H3	3	1	3	0	1
男	13	2014-12-14	2	2014	201404	#NULL!	季H3	3	1	2	0	1
男	13	2014-05-12	0	2014	201402	#NULL!	季H3	3	1	0	0	1
男	13	2014-10-09	0	2014	201404	#NULL!	季H3	3	1	0	0	1
男	14	2014-11-27	3	2014	201404	#NULL!	季H3	3	1	3	0	1
男	14	2014-06-28	1	2014	201402	#NULL!	季H3	3	1	1	0	1
男	14	2014-09-05	1	2014	201403	#NULL!	季H3	3	1	1	0	1
男	14	2014-07-10	0	2014	201403	#NULL!	季H3	3	1	0	0	1
女	15	2014-05-12	1	2014	201402	#NULL!	季H3	3	1	1	0	2
男	15	2014-07-09	0	2014	201403	#NULL!	季H3	3	1	0	0	2
男	16	2014-06-08	2	2014	201402	#NULL!	季H3	3	1	2	0	2
男	16	2014-07-06	2	2014	201403	#NULL!	季H3	3	1	2	0	2
男	16	2014-05-07	0	2014	201402	#NULL!	季H3	3	1	0	0	2
男	16	2014-07-21	0	2014	201403	#NULL!	季H3	3	1	0	0	2
男	17	2014-07-07	3	2014	201403	#NULL!	季H3	3	1	3	0	2
男	17	2014-07-21	3	2014	201403	#NULL!	季H3	3	1	3	0	2
男	17	2014-07-15	2	2014	201403	#NULL!	季H3	3	1	2	0	2
男	17	2014-07-02	1	2014	201403	#NULL!	季H3	3	1	1	0	2
男	17	2014-01-02	0	2014	201401	#NULL!	季H3	3	1	0	0	2
男	17	2014-01-02	0	2014	201401	#NULL!	季H3	3	1	0	0	2
男	18	2014-06-05	1	2014	201402	#NULL!	季H3	3	1	1	0	2
女	18	2014-07-18	1	2014	201403	#NULL!	季H3	3	1	1	0	2
女	18	2014-07-29	1	2014	201403	#NULL!	季H3	3	1	1	0	2
女	18	2014-06-10	0	2014	201402	#NULL!	季H3	3	1	0	0	2
女	18	2014-05-12	8	2014	201402	#NULL!	季H3	3	1	8	1	2
女	19	2014-07-22	3	2014	201403	#NULL!	季H3	3	1	3	0	2
男	19	2014-07-09	1	2014	201403	#NULL!	季H3	3	1	1	0	2
男	19	2014-07-08	0	2014	201403	#NULL!	季H3	3	1	0	0	2
女	20	2014-05-06	2	2014	201402	#NULL!	季H3	3	1	2	0	2
女	20	2014-07-02	1	2014	201403	#NULL!	季H3	3	1	1	0	2
男	20	2014-07-10	1	2014	201403	#NULL!	季H3	3	1	1	0	2
男	20	2014-07-16	1	2014	201403	#NULL!	季H3	3	1	1	0	2
男	20	2014-06-06	0	2014	201402	#NULL!	季H3	3	1	0	0	2
男	20	2014-06-24	0	2014	201402	#NULL!	季H3	3	1	0	0	2
男	20	2014-06-28	0	2014	201402	#NULL!	季H3	3	1	0	0	2
男	20	2014-07-09	0	2014	201403	#NULL!	季H3	3	1	0	0	2
女	20	2014-07-16	0	2014	201403	#NULL!	季H3	3	1	0	0	2
女	20	2014-06-21	4	2014	201402	#NULL!	季H3	3	1	4	1	2
女	20	2014-06-21	4	2014	201402	#NULL!	季H3	3	1	4	1	2
男	21	2014-07-21	3	2014	201403	#NULL!	季H3	3	1	3	0	2
男	21	2014-07-17	1	2014	201403	#NULL!	季H3	3	1	1	0	2
女	21	2014-06-26	0	2014	201402	#NULL!	季H3	3	1	0	0	2
女	21	2014-07-02	0	2014	201402	#NULL!	季H3	3	1	0	0	2
女	22	2014-06-22	3	2014	201402	#NULL!	季H3	3	1	3	0	2
女	22	2014-09-20	3	2014	201403	#NULL!	季H3	3	1	3	0	2
女	22	2014-06-08	2	2014	201402	#NULL!	季H3	3	1	2	0	2
女	22	2014-08-16	2	2014	201403	#NULL!	季H3	3	1	2	0	2
女	22	2014-04-13	1	2014	201402	#NULL!	季H3	3	1	1	0	2
女	22	2014-06-29	1	2014	201402	#NULL!	季H3	3	1	1	0	2
男	22	2014-07-05	1	2014	201403	#NULL!	季H3	3	1	1	0	2
女	22	2014-07-06	1	2014	201403	#NULL!	季H3	3	1	1	0	2
女	22	2014-07-07	1	2014	201403	#NULL!	季H3	3	1	1	0	2
女	22	2014-07-31	1	2014	201403	#NULL!	季H3	3	1	1	0	2
男	22	2014-04-26	0	2014	201402	#NULL!	季H3	3	1	0	0	2
男	22	2014-05-06	0	2014	201402	#NULL!	季H3	3	1	0	0	2
女	22	2014-06-05	0	2014	201402	#NULL!	季H3	3	1	0	0	2
女	22	2014-07-01	0	2014	201402	#NULL!	季H3	3	1	0	0	2
男	22	2014-07-25	0	2014	201403	#NULL!	季H3	3	1	0	0	2
女	22	2014-09-01	0	2014	201403	#NULL!	季H3	3	1	0	0	2
男	22	2014-06-29	4	2014	201402	#NULL!	季H3	3	1	4	1	2
女	23	2014-05-08	2	2014	201402	#NULL!	季H3	3	1	2	0	2
女	23	2014-05-29	1	2014	201402	#NULL!	季H3	3	1	1	0	2
男	23	2014-07-03	1	2014	201403	#NULL!	季H3	3	1	1	0	2
男	23	2014-07-08	1	2014	201403	#NULL!	季H3	3	1	1	0	2
男	23	2014-07-13	1	2014	201403	#NULL!	季H3	3	1	1	0	2
女	23	2014-05-07	0	2014	201402	#NULL!	季H3	3	1	0	0	2
女	23	2014-05-19	0	2014	201402	#NULL!	季H3	3	1	0	0	2
女	23	2014-07-19	0	2014	201403	#NULL!	季H3	3	1	0	0	2
女	23	2014-05-10	5	2014	201402	#NULL!	季H3	3	1	5	1	2
男	23	2014-07-12	4	2014	201403	#NULL!	季H3	3	1	4	1	2
女	24	2014-06-16	2	2014	201402	#NULL!	季H3	3	1	2	0	2
女	24	2014-06-23	2	2014	201402	#NULL!	季H3	3	1	2	0	2
男	24	2014-06-23	2	2014	201402	#NULL!	季H3	3	1	2	0	2
女	24	2014-07-02	1	2014	201403	#NULL!	季H3	3	1	1	0	2
男	24	2014-07-09	1	2014	201403	#NULL!	季H3	3	1	1	0	2
男	24	2014-07-10	1	2014	201403	#NULL!	季H3	3	1	1	0	2
女	24	2014-06-29	0	2014	201402	#NULL!	季H3	3	1	0	0	2
男	24	2014-08-10	0	2014	201403	#NULL!	季H3	3	1	0	0	2
女	24	2014-01-10	4	2014	201401	#NULL!	季H3	3	1	4	1	2
女	24	2014-06-21	4	2014	201402	#NULL!	季H3	3	1	4	1	2
男	24	2014-06-29	4	2014	201402	#NULL!	季H3	3	1	4	1	2
女	25	2014-06-22	3	2014	201402	#NULL!	季H3	4	1	3	0	3
男	25	2014-07-02	2	2014	201403	#NULL!	季H3	4	1	2	0	3
男	25	2014-07-08	1	2014	201403	#NULL!	季H3	4	1	1	0	3
男	25	2014-06-17	0	2014	201402	#NULL!	季H3	4	1	0	0	3
男	25	2014-07-15	0	2014	201403	#NULL!	季H3	4	1	0	0	3
女	25	2014-07-30	0	2014	201403	#NULL!	季H3	4	1	0	0	3
男	25	2014-04-01	4	2014	201402	#NULL!	季H3	4	1	4	1	3
女	25	2014-06-26	4	2014	201402	#NULL!	季H3	4	1	4	1	3
女	26	2014-06-16	2	2014	201402	#NULL!	季H3	4	1	2	0	3
男	26	2014-07-15	2	2014	201403	#NULL!	季H3	4	1	2	0	3
男	26	2014-05-15	1	2014	201402	#NULL!	季H3	4	1	1	0	3
女	26	2014-06-22	1	2014	201402	#NULL!	季H3	4	1	1	0	3
女	26	2014-06-22	1	2014	201402	#NULL!	季H3	4	1	1	0	3
女	26	2014-07-07	1	2014	201403	#NULL!	季H3	4	1	1	0	3
女	26	2014-07-08	1	2014	201403	#NULL!	季H3	4	1	1	0	3
男	26	2014-07-10	1	2014	201403	#NULL!	季H3	4	1	1	0	3
女	26	2014-07-11	1	2014	201403	#NULL!	季H3	4	1	1	0	3
女	26	2014-07-09	0	2014	201403	#NULL!	季H3	4	1	0	0	3
男	27	2014-07-21	3	2014	201403	#NULL!	季H3	4	1	3	0	3
男	27	2014-07-20	2	2014	201403	#NULL!	季H3	4	1	2	0	3
女	27	2014-08-16	2	2014	201403	#NULL!	季H3	4	1	2	0	3
男	27	2014-04-25	1	2014	201402	#NULL!	季H3	4	1	1	0	3
男	27	2014-06-28	1	2014	201402	#NULL!	季H3	4	1	1	0	3
男	27	2014-07-01	1	2014	201402	#NULL!	季H3	4	1	1	0	3
男	27	2014-09-17	1	2014	201403	#NULL!	季H3	4	1	1	0	3
男	27	2014-05-03	0	2014	201402	#NULL!	季H3	4	1	0	0	3
女	27	2014-06-26	0	2014	201402	#NULL!	季H3	4	1	0	0	3
女	27	2014-07-01	0	2014	201402	#NULL!	季H3	4	1	0	0	3
女	27	2014-07-16	0	2014	201403	#NULL!	季H3	4	1	0	0	3
男	27	2014-06-26	9	2014	201403	#NULL!	季H3	4	1	9	1	3
女	27	2014-06-13	4	2014	201402	#NULL!	季H3	4	1	4	1	3
男	27	2014-06-14	4	2014	201402	#NULL!	季H3	4	1	4	1	3
女	27	2014-06-21	4	2014	201402	#NULL!	季H3	4	1	4	1	3
女	28	2014-02-04	1	2014	201401	#NULL!	季H3	4	1	1	0	3
女	28	2014-05-15	1	2014	201402	#NULL!	季H3	4	1	1	0	3
男	28	2014-07-13	1	2014	201403	#NULL!	季H3	4	1	1	0	3
男	28	2014-05-04	0	2014	201402	#NULL!	季H3	4	1	0	0	3
女	28	2014-06-26	0	2014	201402	#NULL!	季H3	4	1	0	0	3
男	28	2014-07-03	0	2014	201403	#NULL!	季H3	4	1	0	0	3
男	28	2014-07-08	0	2014	201403	#NULL!	季H3	4	1	0	0	3
男	28	2014-07-27	0	2014	201403	#NULL!	季H3	4	1	0	0	3
男	28	2014-08-29	0	2014	201403	#NULL!	季H3	4	1	0	0	3
女	28	2014-10-22	0	2014	201404	#NULL!	季H3	4	1	0	0	3
男	28	2014-07-01	7	2014	201403	#NULL!	季H3	4	1	7	1	3
男	28	2014-06-29	4	2014	201402	#NULL!	季H3	4	1	4	1	3
男	29	2014-07-03	3	2014	201403	#NULL!	季H3	4	1	3	0	3
女	29	2014-05-15	0	2014	201402	#NULL!	季H3	4	1	0	0	3
男	29	2014-07-14	0	2014	201403	#NULL!	季H3	4	1	0	0	3
男	29	2014-12-16	0	2014	201404	#NULL!	季H3	4	1	0	0	3
女	30	2014-07-09	3	2014	201403	#NULL!	季H3	4	1	3	0	3
女	30	2014-07-09	2	2014	201403	#NULL!	季H3	4	1	2	0	3
女	30	2014-06-28	1	2014	201402	#NULL!	季H3	4	1	1	0	3
女	30	2014-07-11	1	2014	201403	#NULL!	季H3	4	1	1	0	3
男	30	2014-07-01	0	2014	201402	#NULL!	季H3	4	1	0	0	3
女	30	2014-06-28	5	2014	201402	#NULL!	季H3	4	1	5	1	3
女	31	2014-06-21	2	2014	201402	#NULL!	季H3	4	1	2	0	3
男	31	2014-01-29	0	2014	201401	#NULL!	季H3	4	1	0	0	3
女	31	2014-12-16	5	2014	201404	#NULL!	季H3	4	1	5	1	3
女	32	2014-09-08	1	2014	201403	#NULL!	季H3	4	1	11	0	3
女	32	2014-07-02	3	2014	201403	#NULL!	季H3	4	1	3	0	3
女	32	2014-07-11	2	2014	201403	#NULL!	季H3	4	1	2	0	3
女	32	2014-07-15	0	2014	201403	#NULL!	季H3	4	1	0	0	3
男	32	2014-09-16	0	2014	201403	#NULL!	季H3	4	1	0	0	3
男	32	2014-06-24	4	2014	201402	#NULL!	季H3	4	1	4	1	3
男	33	2014-07-23	1	2014	201403	#NULL!	季H3	4	1	1	0	3
女	33	2014-01-01	0	2014	201401	#NULL!	季H3	4	1	0	0	3
女	34	2014-06-18	3	2014	201403	#NULL!	季H3	4	1	17	0	3
女	34	2014-06-16	2	2014	201402	#NULL!	季H3	4	1	2	0	3
男	35	2014-07-12	2	2014	201403	#NULL!	季H3	4	1	2	0	3
女	36	2014-06-26	0	2014	201402	#NULL!	季H3	4	1	0	0	3
男	37	2014-09-20	2	2014	201403	#NULL!	季H3	4	1	2	0	3
男	37	2014-06-07	1	2014	201402	#NULL!	季H3	4	1	1	0	3
女	37	2014-07-09	0	2014	201403	#NULL!	季H3	4	1	0	0	3
男	37	2014-07-09	5	2014	201403	#NULL!	季H3	4	1	5	1	3
男	38	2014-07-20	2	2014	201403	#NULL!	季H3	4	1	2	0	3
男	38	2014-06-23	1	2014	201402	#NULL!	季H3	4	1	1	0	3
女	38	2014-07-09	0	2014	201403	#NULL!	季H3	4	1	0	0	3
女	39	2014-07-10	1	2014	201403	#NULL!	季H3	4	1	1	0	3
女	39	2014-07-18	4	2014	201403	#NULL!	季H3	4	1	4	1	3
男	40	2014-06-28	3	2014	201402	#NULL!	季H3	4	1	3	0	3
男	40	2014-07-01	1	2014	201402	#NULL!	季H3	4	1	1	0	3
男	40	2014-07-01	7	2014	201403	#NULL!	季H3	4	1	7	1	3
男	41	2014-07-01	2	2014	201403	#NULL!	季H3	4	1	2	0	3
女	41	2014-07-20	2	2014	201403	#NULL!	季H3	4	1	2	0	3
男	41	2014-07-08	0	2014	201403	#NULL!	季H3	4	1	0	0	3
男	41	2014-02-27	6	2014	201401	#NULL!	季H3	4	1	6	1	3
女	42	2014-07-21	1	2014	201403	#NULL!	季H3	4	1	1	0	3
女	42	2014-01-27	0	2014	201401	#NULL!	季H3	4	1	0	0	3
男	42	2014-07-08	0	2014	201403	#NULL!	季H3	4	1	0	0	3
女	42	2014-07-05	6	2014	201403	#NULL!	季H3	4	1	6	1	3
男	43	2014-06-16	2	2014	201402	#NULL!	季H3	4	1	2	0	3
男	45	2014-07-17	2	2014	201403	#NULL!	季H3	4	1	2	0	3
男	45	2014-02-04	1	2014	201401	#NULL!	季H3	4	1	1	0	3
女	45	2014-07-01	0	2014	201402	#NULL!	季H3	4	1	0	0	3
男	48	2014-08-02	1	2014	201403	#NULL!	季H3	4	1	1	0	3
男	50	2014-07-09	0	2014	201403	#NULL!	季H3	4	1	0	0	3
女	50	2014-07-11	0	2014	201403	#NULL!	季H3	4	1	0	0	3
男	50	2014-08-30	0	2014	201403	#NULL!	季H3	4	1	0	0	3
女	52	2014-07-17	1	2014	201403	#NULL!	季H3	4	1	1	0	3
女	54	2014-06-07	1	2014	201402	#NULL!	季H3	4	1	1	0	3
女	54	2014-06-07	0	2014	201402	#NULL!	季H3	4	1	0	0	3
男	56	2014-09-09	1	2014	201403	#NULL!	季H3	4	1	1	0	3
女	56	2014-07-20	0	2014	201403	#NULL!	季H3	4	1	0	0	3
男	56	2014-11-14	0	2014	201404	#NULL!	季H3	4	1	0	0	3
女	57	2014-07-03	3	2014	201403	#NULL!	季H3	4	1	3	0	3
男	59	2014-09-01	1	2014	201403	#NULL!	季H3	4	1	1	0	3
男	59	2014-07-14	0	2014	201403	#NULL!	季H3	4	1	0	0	3
男	59	2014-05-07	4	2014	201402	#NULL!	季H3	4	1	4	1	3
男	60	2014-07-12	0	2014	201403	#NULL!	季H3	4	1	0	0	4
男	60	2014-08-03	10	2014	201403	#NULL!	季H3	4	1	10	1	4
女	62	2014-08-16	2	2014	201403	#NULL!	季H3	4	1	2	0	4
女	64	2014-07-01	7	2014	201403	#NULL!	季H3	4	1	7	1	4
男	65	2014-03-06	1	2014	201401	#NULL!	季H3	4	1	1	0	4
女	65	2014-06-26	0	2014	201402	#NULL!	季H3	4	1	0	0	4
男	66	2014-01-22	7	2014	201401	#NULL!	季H3	4	1	7	1	4
女	67	2014-07-08	0	2014	201403	#NULL!	季H3	4	1	0	0	4
男	67	2014-12-16	5	2014	201404	#NULL!	季H3	4	1	5	1	4
男	70	2014-06-20	0	2014	201402	#NULL!	季H3	4	1	0	0	4
女	71	2014-07-16	3	2014	201403	#NULL!	季H3	4	1	3	0	4
男	73	2014-07-20	4	2014	201403	#NULL!	季H3	4	1	4	1	4
男	75	2014-07-11	1	2014	201403	#NULL!	季H3	4	1	1	0	4
男	76	2014-07-17	7	2014	201403	#NULL!	季H3	4	1	7	1	4
男	76	2014-07-18	4	2014	201403	#NULL!	季H3	4	1	4	1	4
女	79	2014-07-06	0	2014	201403	#NULL!	季H3	4	1	0	0	4
女	81	2014-09-21	2	2014	201403	#NULL!	季H3	4	1	2	0	4
男	82	2014-10-08	1	2014	201404	#NULL!	季H3	4	1	1	0	4
男	84	2014-01-06	1	2014	201401	#NULL!	季H3	4	1	1	0	4
男	90	2014-07-21	0	2014	201403	#NULL!	季H3	4	1	0	0	4
男	0.33	2014-01-02	2	2014	201401	#NULL!	新甲H1	0	1	2	0	0
男	1	2014-01-03	2	2014	201401	#NULL!	新甲H1	1	1	2	0	0
女	1	2014-02-05	1	2014	201401	#NULL!	新甲H1	1	1	1	0	0
女	1	2014-01-08	4	2014	201401	#NULL!	新甲H1	1	1	4	1	0
女	3	2014-02-25	2	2014	201401	#NULL!	新甲H1	1	1	2	0	0
女	4	2013-12-30	3	2014	201401	#NULL!	新甲H1	1	1	3	0	0
男	4	2014-02-27	0	2014	201401	#NULL!	新甲H1	1	1	0	0	0
男	5	2014-01-07	0	2014	201401	#NULL!	新甲H1	2	1	0	0	1
女	5	2014-03-17	0	2014	201401	#NULL!	新甲H1	2	1	0	0	1
男	5	2014-01-07	8	2014	201401	#NULL!	新甲H1	2	1	8	1	1
女	6	2014-02-13	1	2014	201401	#NULL!	新甲H1	2	1	1	0	1
女	7	2013-12-30	3	2014	201401	#NULL!	新甲H1	2	1	3	0	1
女	7	2014-01-13	0	2014	201401	#NULL!	新甲H1	2	1	0	0	1
女	9	2014-01-13	1	2014	201401	#NULL!	新甲H1	2	1	1	0	1
男	10	2014-03-02	2	2014	201401	#NULL!	新甲H1	3	1	2	0	1
女	15	2014-02-04	1	2014	201401	#NULL!	新甲H1	3	1	1	0	2
女	19	2014-01-02	2	2014	201401	#NULL!	新甲H1	3	1	2	0	2
男	24	2014-01-10	1	2014	201401	#NULL!	新甲H1	3	1	1	0	2
女	25	2014-01-26	1	2014	201401	#NULL!	新甲H1	4	1	1	0	3
男	27	2014-02-27	0	2014	201401	#NULL!	新甲H1	4	1	0	0	3
男	29	2014-02-09	2	2014	201401	#NULL!	新甲H1	4	1	2	0	3
女	33	2014-03-12	0	2014	201401	#NULL!	新甲H1	4	1	0	0	3
男	34	2014-02-19	4	2014	201401	#NULL!	新甲H1	4	1	4	1	3
男	35	2014-02-05	0	2014	201401	#NULL!	新甲H1	4	1	0	0	3
男	43	2013-12-29	5	2014	201401	#NULL!	新甲H1	4	1	5	1	3
男	45	2013-12-31	1	2014	201401	#NULL!	新甲H1	4	1	1	0	3
男	49	2014-01-15	0	2014	201401	#NULL!	新甲H1	4	1	0	0	3
男	51	2014-03-08	3	2014	201401	#NULL!	新甲H1	4	1	3	0	3
男	74	2014-03-10	1	2014	201401	#NULL!	新甲H1	4	1	1	0	4
男	79	2014-01-22	0	2014	201401	#NULL!	新甲H1	4	1	0	0	4
女	1	2013-12-12	0	2013	201304	#NULL!	B型	1	1	0	0	0
男	1	2013-12-29	0	2013	201304	#NULL!	B型	1	1	0	0	0
男	2	2013-12-01	2	2013	201304	#NULL!	B型	1	1	2	0	0
男	2	2013-11-26	1	2013	201304	#NULL!	B型	1	1	1	0	0
男	3	2013-12-21	1	2013	201304	#NULL!	B型	1	1	1	0	0
男	4	2013-11-13	1	2013	201304	#NULL!	B型	1	1	1	0	0
男	4	2013-12-10	1	2013	201304	#NULL!	B型	1	1	1	0	0
男	4	2013-12-17	0	2013	201304	#NULL!	B型	1	1	0	0	0
女	4	2013-12-19	0	2013	201304	#NULL!	B型	1	1	0	0	0
女	4	2013-12-19	0	2013	201304	#NULL!	B型	1	1	0	0	0
男	4	2013-12-29	0	2013	201304	#NULL!	B型	1	1	0	0	0
男	5	2013-12-18	3	2013	201304	#NULL!	B型	2	1	3	0	1
男	5	2013-12-02	2	2013	201304	#NULL!	B型	2	1	2	0	1
男	5	2013-12-17	2	2013	201304	#NULL!	B型	2	1	2	0	1
女	5	2013-12-28	2	2013	201304	#NULL!	B型	2	1	2	0	1
男	5	2013-12-10	1	2013	201304	#NULL!	B型	2	1	1	0	1
男	5	2013-12-13	1	2013	201304	#NULL!	B型	2	1	1	0	1
女	5	2013-12-16	1	2013	201304	#NULL!	B型	2	1	1	0	1
男	5	2013-12-04	0	2013	201304	#NULL!	B型	2	1	0	0	1
女	6	2013-03-30	2	2013	201301	#NULL!	B型	2	1	2	0	1
女	6	2013-03-30	2	2013	201301	#NULL!	B型	2	1	2	0	1
男	6	2013-12-02	2	2013	201304	#NULL!	B型	2	1	2	0	1
男	6	2013-12-02	2	2013	201304	#NULL!	B型	2	1	2	0	1
女	6	2013-12-03	2	2013	201304	#NULL!	B型	2	1	2	0	1
女	6	2013-12-07	2	2013	201304	#NULL!	B型	2	1	2	0	1
男	6	2013-12-15	2	2013	201304	#NULL!	B型	2	1	2	0	1
男	6	2013-12-23	2	2013	201304	#NULL!	B型	2	1	2	0	1
男	6	2013-12-28	2	2013	201304	#NULL!	B型	2	1	2	0	1
女	6	2013-11-20	1	2013	201304	#NULL!	B型	2	1	1	0	1
女	6	2013-11-21	1	2013	201304	#NULL!	B型	2	1	1	0	1
男	6	2013-12-02	1	2013	201304	#NULL!	B型	2	1	1	0	1
男	6	2013-12-10	1	2013	201304	#NULL!	B型	2	1	1	0	1
女	6	2013-12-12	1	2013	201304	#NULL!	B型	2	1	1	0	1
女	6	2013-12-12	1	2013	201304	#NULL!	B型	2	1	1	0	1
男	6	2013-12-17	1	2013	201304	#NULL!	B型	2	1	1	0	1
女	6	2013-12-18	1	2013	201304	#NULL!	B型	2	1	1	0	1
女	6	2013-12-24	1	2013	201304	#NULL!	B型	2	1	1	0	1
男	6	2013-12-28	1	2013	201304	#NULL!	B型	2	1	1	0	1
女	6	2013-12-29	1	2013	201304	#NULL!	B型	2	1	1	0	1
男	6	2013-12-29	1	2013	201304	#NULL!	B型	2	1	1	0	1
男	6	2013-12-20	0	2013	201304	#NULL!	B型	2	1	0	0	1
女	6	2013-12-30	0	2013	201304	#NULL!	B型	2	1	0	0	1
男	7	2013-12-09	3	2013	201304	#NULL!	B型	2	1	3	0	1
女	7	2013-12-01	2	2013	201304	#NULL!	B型	2	1	2	0	1
男	7	2013-12-04	2	2013	201304	#NULL!	B型	2	1	2	0	1
女	7	2013-11-28	1	2013	201304	#NULL!	B型	2	1	1	0	1
女	7	2013-12-09	1	2013	201304	#NULL!	B型	2	1	1	0	1
女	7	2013-12-10	1	2013	201304	#NULL!	B型	2	1	1	0	1
男	7	2013-12-12	1	2013	201304	#NULL!	B型	2	1	1	0	1
女	7	2013-12-15	1	2013	201304	#NULL!	B型	2	1	1	0	1
女	7	2013-12-16	1	2013	201304	#NULL!	B型	2	1	1	0	1
男	7	2013-12-17	1	2013	201304	#NULL!	B型	2	1	1	0	1
女	7	2013-12-18	1	2013	201304	#NULL!	B型	2	1	1	0	1
男	7	2013-12-18	1	2013	201304	#NULL!	B型	2	1	1	0	1
男	7	2013-12-24	1	2013	201304	#NULL!	B型	2	1	1	0	1
男	7	2013-12-25	1	2013	201304	#NULL!	B型	2	1	1	0	1
男	7	2013-12-29	1	2013	201304	#NULL!	B型	2	1	1	0	1
男	7	2013-12-30	1	2013	201304	#NULL!	B型	2	1	1	0	1
男	7	2013-11-26	0	2013	201304	#NULL!	B型	2	1	0	0	1
女	7	2013-12-19	0	2013	201304	#NULL!	B型	2	1	0	0	1
男	7	2013-12-19	0	2013	201304	#NULL!	B型	2	1	0	0	1
男	7	2013-12-19	0	2013	201304	#NULL!	B型	2	1	0	0	1
女	7	2013-12-29	0	2013	201304	#NULL!	B型	2	1	0	0	1
男	7	2013-12-31	0	2013	201304	#NULL!	B型	2	1	0	0	1
女	8	2013-12-03	3	2013	201304	#NULL!	B型	2	1	3	0	1
女	8	2013-11-10	2	2013	201304	#NULL!	B型	2	1	2	0	1
女	8	2013-11-10	2	2013	201304	#NULL!	B型	2	1	2	0	1
女	8	2013-12-08	2	2013	201304	#NULL!	B型	2	1	2	0	1
女	8	2013-12-20	2	2013	201304	#NULL!	B型	2	1	2	0	1
男	8	2013-11-10	1	2013	201304	#NULL!	B型	2	1	1	0	1
女	8	2013-11-18	1	2013	201304	#NULL!	B型	2	1	1	0	1
男	8	2013-11-26	1	2013	201304	#NULL!	B型	2	1	1	0	1
男	8	2013-11-26	1	2013	201304	#NULL!	B型	2	1	1	0	1
女	8	2013-12-09	1	2013	201304	#NULL!	B型	2	1	1	0	1
女	8	2013-12-12	1	2013	201304	#NULL!	B型	2	1	1	0	1
女	8	2013-12-12	1	2013	201304	#NULL!	B型	2	1	1	0	1
男	8	2013-12-12	1	2013	201304	#NULL!	B型	2	1	1	0	1
男	8	2013-12-14	1	2013	201304	#NULL!	B型	2	1	1	0	1
男	8	2013-12-22	1	2013	201304	#NULL!	B型	2	1	1	0	1
男	8	2013-11-28	0	2013	201304	#NULL!	B型	2	1	0	0	1
男	8	2013-12-02	0	2013	201304	#NULL!	B型	2	1	0	0	1
女	8	2013-12-19	0	2013	201304	#NULL!	B型	2	1	0	0	1
女	8	2013-12-26	0	2013	201304	#NULL!	B型	2	1	0	0	1
男	8	2013-12-20	4	2013	201304	#NULL!	B型	2	1	4	1	1
女	9	2013-12-17	2	2013	201304	#NULL!	B型	2	1	2	0	1
男	9	2013-12-28	2	2013	201304	#NULL!	B型	2	1	2	0	1
男	9	2013-11-26	1	2013	201304	#NULL!	B型	2	1	1	0	1
女	9	2013-11-27	1	2013	201304	#NULL!	B型	2	1	1	0	1
男	9	2013-11-28	1	2013	201304	#NULL!	B型	2	1	1	0	1
男	9	2013-12-05	1	2013	201304	#NULL!	B型	2	1	1	0	1
男	9	2013-12-10	1	2013	201304	#NULL!	B型	2	1	1	0	1
男	9	2013-12-10	1	2013	201304	#NULL!	B型	2	1	1	0	1
男	9	2013-12-21	1	2013	201304	#NULL!	B型	2	1	1	0	1
男	9	2013-12-27	1	2013	201304	#NULL!	B型	2	1	1	0	1
男	9	2013-11-25	0	2013	201304	#NULL!	B型	2	1	0	0	1
男	9	2013-12-01	0	2013	201304	#NULL!	B型	2	1	0	0	1
女	9	2013-12-09	0	2013	201304	#NULL!	B型	2	1	0	0	1
男	9	2013-12-31	0	2013	201304	#NULL!	B型	2	1	0	0	1
男	9	2013-12-02	4	2013	201304	#NULL!	B型	2	1	4	1	1
女	10	2013-11-20	2	2013	201304	#NULL!	B型	3	1	2	0	1
女	10	2013-12-01	1	2013	201304	#NULL!	B型	3	1	1	0	1
男	10	2013-12-12	1	2013	201304	#NULL!	B型	3	1	1	0	1
男	10	2013-11-28	0	2013	201304	#NULL!	B型	3	1	0	0	1
女	10	2013-11-29	0	2013	201304	#NULL!	B型	3	1	0	0	1
女	10.1	2013-12-03	1	2013	201304	#NULL!	B型	3	1	1	0	1
男	11	2013-07-20	2	2013	201303	#NULL!	B型	3	1	2	0	1
男	11	2013-12-16	2	2013	201304	#NULL!	B型	3	1	2	0	1
女	11	2013-11-06	1	2013	201304	#NULL!	B型	3	1	1	0	1
男	11	2013-12-01	1	2013	201304	#NULL!	B型	3	1	1	0	1
男	11	2013-12-12	1	2013	201304	#NULL!	B型	3	1	1	0	1
女	11	2013-12-25	1	2013	201304	#NULL!	B型	3	1	1	0	1
女	11	2013-12-26	1	2013	201304	#NULL!	B型	3	1	1	0	1
男	11	2013-12-16	0	2013	201304	#NULL!	B型	3	1	0	0	1
男	12	2013-12-16	2	2013	201304	#NULL!	B型	3	1	2	0	1
男	12	2013-11-14	1	2013	201304	#NULL!	B型	3	1	1	0	1
女	12	2013-11-17	1	2013	201304	#NULL!	B型	3	1	1	0	1
男	12	2013-11-15	0	2013	201304	#NULL!	B型	3	1	0	0	1
男	12	2013-12-16	0	2013	201304	#NULL!	B型	3	1	0	0	1
女	13	2013-10-09	2	2013	201304	#NULL!	B型	3	1	2	0	1
男	14	2013-11-30	2	2013	201304	#NULL!	B型	3	1	2	0	1
女	15	2013-12-19	0	2013	201304	#NULL!	B型	3	1	0	0	2
女	18	2013-12-23	0	2013	201304	#NULL!	B型	3	1	0	0	2
女	25	2013-12-09	1	2013	201304	#NULL!	B型	4	1	1	0	3
女	30	2013-12-18	2	2013	201304	#NULL!	B型	4	1	2	0	3
女	30	2013-12-26	1	2013	201304	#NULL!	B型	4	1	1	0	3
女	39	2013-12-01	2	2013	201304	#NULL!	B型	4	1	2	0	3
女	41	2013-11-15	0	2013	201304	#NULL!	B型	4	1	0	0	3
女	50	2013-12-26	2	2013	201304	#NULL!	B型	4	1	2	0	3
男	1	2013-12-17	3	2013	201304	#NULL!	B型	1	1	3	0	0
男	1	2013-12-29	2	2013	201304	#NULL!	B型	1	1	2	0	0
女	3	2013-12-23	3	2013	201304	#NULL!	B型	1	1	3	0	0
女	4	2013-12-23	2	2013	201304	#NULL!	B型	1	1	2	0	0
男	4	2013-12-22	1	2013	201304	#NULL!	B型	1	1	1	0	0
男	4	2013-11-19	0	2013	201304	#NULL!	B型	1	1	0	0	0
女	5	2013-12-15	3	2013	201304	#NULL!	B型	2	1	3	0	1
女	5	2013-12-21	3	2013	201304	#NULL!	B型	2	1	3	0	1
女	5	2013-12-16	2	2013	201304	#NULL!	B型	2	1	2	0	1
男	5	2013-12-20	2	2013	201304	#NULL!	B型	2	1	2	0	1
女	6	2013-12-27	3	2013	201304	#NULL!	B型	2	1	3	0	1
男	7	2013-12-21	2	2013	201304	#NULL!	B型	2	1	2	0	1
男	7	2013-12-29	2	2013	201304	#NULL!	B型	2	1	2	0	1
女	8	2013-12-08	3	2013	201304	#NULL!	B型	2	1	3	0	1
男	8	2013-12-24	3	2013	201304	#NULL!	B型	2	1	3	0	1
男	9	2013-12-02	1	2013	201304	#NULL!	B型	2	1	1	0	1
男	15	2013-12-27	1	2013	201304	#NULL!	B型	3	1	1	0	2
男	19	2013-12-17	2	2013	201304	#NULL!	B型	3	1	2	0	2
女	25	2013-12-27	2	2013	201304	#NULL!	B型	4	1	2	0	3
男	27	2013-12-27	3	2013	201304	#NULL!	B型	4	1	3	0	3
男	34	2013-12-20	8	2013	201304	#NULL!	B型	4	1	8	1	3
女	47	2013-12-17	1	2013	201304	#NULL!	B型	4	1	1	0	3
女	55	2013-12-11	2	2013	201304	#NULL!	B型	4	1	2	0	3
男	62	2013-12-10	5	2013	201304	#NULL!	B型	4	1	5	1	4
女	10	2013-01-04	1	2013	201301	#NULL!	B型	3	1	1	0	1
男	12	2013-01-03	2	2013	201301	#NULL!	B型	3	1	2	0	1
女	2	2013-01-20	2	2013	201301	#NULL!	混合型	1	1	2	0	0
男	9	2013-01-08	0	2013	201301	#NULL!	混合型	2	1	0	0	1
女	54	2013-04-18	0	2013	201302	#NULL!	混合型	4	1	0	0	3
女	0.16	2013-12-27	3	2013	201304	#NULL!	季H3	0	1	3	0	0
男	1	2013-09-17	2	2013	201303	#NULL!	季H3	1	1	2	0	0
男	1	2013-10-14	1	2013	201304	#NULL!	季H3	1	1	1	0	0
男	1	2013-11-01	1	2013	201304	#NULL!	季H3	1	1	1	0	0
女	1	2013-11-22	1	2013	201304	#NULL!	季H3	1	1	1	0	0
男	1	2013-11-24	1	2013	201304	#NULL!	季H3	1	1	1	0	0
女	1	2013-03-18	0	2013	201301	#NULL!	季H3	1	1	0	0	0
女	3	2013-10-25	3	2013	201304	#NULL!	季H3	1	1	3	0	0
男	3	2013-09-20	1	2013	201303	#NULL!	季H3	1	1	1	0	0
男	4	2013-01-13	2	2013	201301	#NULL!	季H3	1	1	2	0	0
男	4	2013-01-13	2	2013	201301	#NULL!	季H3	1	1	2	0	0
男	4	2013-11-07	1	2013	201304	#NULL!	季H3	1	1	1	0	0
男	4	2013-10-30	0	2013	201304	#NULL!	季H3	1	1	0	0	0
女	4	2013-12-08	0	2013	201304	#NULL!	季H3	1	1	0	0	0
女	4	2013-11-11	4	2013	201304	#NULL!	季H3	1	1	4	1	0
男	5	2013-09-04	2	2013	201303	#NULL!	季H3	2	1	2	0	1
男	5	2013-10-26	1	2013	201304	#NULL!	季H3	2	1	1	0	1
女	5	2013-11-07	1	2013	201304	#NULL!	季H3	2	1	1	0	1
女	5	2013-12-04	1	2013	201304	#NULL!	季H3	2	1	1	0	1
女	5	2013-09-15	0	2013	201303	#NULL!	季H3	2	1	0	0	1
女	5	2013-01-09	7	2013	201301	#NULL!	季H3	2	1	7	1	1
男	6	2013-10-17	2	2013	201304	#NULL!	季H3	2	1	2	0	1
女	6	2013-10-21	2	2013	201304	#NULL!	季H3	2	1	2	0	1
男	6	2013-01-07	1	2013	201301	#NULL!	季H3	2	1	1	0	1
男	6	2013-09-05	1	2013	201303	#NULL!	季H3	2	1	1	0	1
女	6	2013-10-31	1	2013	201304	#NULL!	季H3	2	1	1	0	1
男	6	2013-12-12	1	2013	201304	#NULL!	季H3	2	1	1	0	1
男	7	2013-10-14	2	2013	201304	#NULL!	季H3	2	1	2	0	1
男	7	2013-10-16	1	2013	201304	#NULL!	季H3	2	1	1	0	1
男	7	2013-10-23	1	2013	201304	#NULL!	季H3	2	1	1	0	1
男	7	2013-12-22	1	2013	201304	#NULL!	季H3	2	1	1	0	1
女	7	2013-10-18	0	2013	201304	#NULL!	季H3	2	1	0	0	1
女	7	2013-11-04	0	2013	201304	#NULL!	季H3	2	1	0	0	1
男	8	2013-10-26	2	2013	201304	#NULL!	季H3	2	1	2	0	1
男	8	2013-11-06	1	2013	201304	#NULL!	季H3	2	1	1	0	1
女	8	2013-11-26	0	2013	201304	#NULL!	季H3	2	1	0	0	1
男	9	2013-10-12	3	2013	201304	#NULL!	季H3	2	1	3	0	1
男	9	2013-10-12	2	2013	201304	#NULL!	季H3	2	1	2	0	1
男	9	2013-11-27	1	2013	201304	#NULL!	季H3	2	1	1	0	1
女	9	2013-12-12	1	2013	201304	#NULL!	季H3	2	1	1	0	1
女	10	2013-02-18	2	2013	201301	#NULL!	季H3	3	1	2	0	1
男	10	2013-11-18	1	2013	201304	#NULL!	季H3	3	1	1	0	1
男	10	2013-12-01	1	2013	201304	#NULL!	季H3	3	1	1	0	1
女	10	2013-12-05	1	2013	201304	#NULL!	季H3	3	1	1	0	1
女	11	2013-11-30	2	2013	201304	#NULL!	季H3	3	1	2	0	1
女	11	2013-10-31	1	2013	201304	#NULL!	季H3	3	1	1	0	1
男	11	2013-11-14	1	2013	201304	#NULL!	季H3	3	1	1	0	1
女	11	2013-12-01	1	2013	201304	#NULL!	季H3	3	1	1	0	1
男	11	2013-12-12	1	2013	201304	#NULL!	季H3	3	1	1	0	1
男	11	2013-10-13	0	2013	201304	#NULL!	季H3	3	1	0	0	1
男	11	2013-10-31	0	2013	201304	#NULL!	季H3	3	1	0	0	1
男	12	2013-10-15	2	2013	201304	#NULL!	季H3	3	1	2	0	1
男	12	2013-11-06	2	2013	201304	#NULL!	季H3	3	1	2	0	1
男	12	2013-12-15	1	2013	201304	#NULL!	季H3	3	1	1	0	1
男	13	2013-12-05	2	2013	201304	#NULL!	季H3	3	1	2	0	1
女	13	2013-11-16	1	2013	201304	#NULL!	季H3	3	1	1	0	1
男	13	2013-12-13	1	2013	201304	#NULL!	季H3	3	1	1	0	1
男	13	2013-12-26	1	2013	201304	#NULL!	季H3	3	1	1	0	1
男	13	2013-11-23	0	2013	201304	#NULL!	季H3	3	1	0	0	1
男	14	2013-10-24	0	2013	201304	#NULL!	季H3	3	1	0	0	1
男	14	2013-11-16	0	2013	201304	#NULL!	季H3	3	1	0	0	1
男	14	2013-11-24	0	2013	201304	#NULL!	季H3	3	1	0	0	1
男	15	2013-11-26	1	2013	201304	#NULL!	季H3	3	1	1	0	2
男	15	2013-11-27	1	2013	201304	#NULL!	季H3	3	1	1	0	2
男	15	2013-11-02	0	2013	201304	#NULL!	季H3	3	1	0	0	2
男	16	2013-01-08	2	2013	201301	#NULL!	季H3	3	1	2	0	2
男	16	2013-12-01	2	2013	201304	#NULL!	季H3	3	1	2	0	2
女	16	2013-10-18	0	2013	201304	#NULL!	季H3	3	1	0	0	2
女	17	2013-10-17	3	2013	201304	#NULL!	季H3	3	1	3	0	2
女	17	2013-12-25	2	2013	201304	#NULL!	季H3	3	1	2	0	2
男	18	2013-09-15	1	2013	201303	#NULL!	季H3	3	1	1	0	2
男	18	2013-11-04	0	2013	201304	#NULL!	季H3	3	1	0	0	2
女	18	2013-12-04	0	2013	201304	#NULL!	季H3	3	1	0	0	2
男	19	2013-10-28	6	2013	201304	#NULL!	季H3	3	1	6	1	2
女	23	2013-11-18	1	2013	201304	#NULL!	季H3	3	1	1	0	2
男	23	2013-11-19	1	2013	201304	#NULL!	季H3	3	1	1	0	2
男	23	2013-11-07	0	2013	201304	#NULL!	季H3	3	1	0	0	2
女	27	2013-10-09	2	2013	201304	#NULL!	季H3	4	1	2	0	3
男	27	2013-12-02	2	2013	201304	#NULL!	季H3	4	1	2	0	3
女	28	2013-10-10	0	2013	201304	#NULL!	季H3	4	1	0	0	3
女	29	2013-12-23	3	2013	201304	#NULL!	季H3	4	1	3	0	3
男	34	2013-12-14	0	2013	201304	#NULL!	季H3	4	1	0	0	3
男	38	2013-12-08	1	2013	201304	#NULL!	季H3	4	1	1	0	3
女	42	2013-12-10	2	2013	201304	#NULL!	季H3	4	1	2	0	3
男	42	2013-12-10	1	2013	201304	#NULL!	季H3	4	1	1	0	3
男	42	2013-12-06	4	2013	201304	#NULL!	季H3	4	1	4	1	3
男	44	2013-11-08	2	2013	201304	#NULL!	季H3	4	1	2	0	3
女	54	2013-10-22	0	2013	201304	#NULL!	季H3	4	1	0	0	3
女	67	2013-09-15	0	2013	201303	#NULL!	季H3	4	1	0	0	4
男	71	2013-12-27	1	2013	201304	#NULL!	季H3	4	1	1	0	4
男	82	2013-12-11	1	2013	201304	#NULL!	季H3	4	1	1	0	4
男	0.1	2013-11-30	2	2013	201304	#NULL!	新甲H1	0	1	2	0	0
男	0.1	2013-11-13	0	2013	201304	#NULL!	新甲H1	0	1	0	0	0
男	0.33	2013-03-10	2	2013	201301	#NULL!	新甲H1	0	1	2	0	0
男	0.33	2013-02-11	0	2013	201301	#NULL!	新甲H1	0	1	0	0	0
男	0.33	2013-11-02	0	2013	201304	#NULL!	新甲H1	0	1	0	0	0
男	0.42	2013-01-20	1	2013	201301	#NULL!	新甲H1	0	1	1	0	0
男	0.42	2013-11-18	1	2013	201304	#NULL!	新甲H1	0	1	1	0	0
男	0.42	2013-10-30	0	2013	201304	#NULL!	新甲H1	0	1	0	0	0
男	0.59	2013-11-12	3	2013	201304	#NULL!	新甲H1	0	1	3	0	0
女	0.67	2013-03-10	1	2013	201301	#NULL!	新甲H1	0	1	1	0	0
男	0.67	2013-12-05	1	2013	201304	#NULL!	新甲H1	0	1	1	0	0
男	0.67	2013-12-10	1	2013	201304	#NULL!	新甲H1	0	1	1	0	0
男	0.67	2013-08-25	0	2013	201303	#NULL!	新甲H1	0	1	0	0	0
男	0.75	2013-10-01	0	2013	201304	#NULL!	新甲H1	0	1	0	0	0
男	0.83	2013-12-05	2	2013	201304	#NULL!	新甲H1	0	1	2	0	0
男	0.83	2013-03-11	1	2013	201301	#NULL!	新甲H1	0	1	1	0	0
女	0.83	2013-11-04	1	2013	201304	#NULL!	新甲H1	0	1	1	0	0
女	0.83	2013-09-29	0	2013	201303	#NULL!	新甲H1	0	1	0	0	0
女	1	2013-10-09	3	2013	201304	#NULL!	新甲H1	1	1	3	0	0
女	1	2013-10-23	3	2013	201304	#NULL!	新甲H1	1	1	3	0	0
女	1	2013-01-28	2	2013	201301	#NULL!	新甲H1	1	1	2	0	0
男	1	2013-11-02	2	2013	201304	#NULL!	新甲H1	1	1	2	0	0
男	1	2013-11-05	2	2013	201304	#NULL!	新甲H1	1	1	2	0	0
女	1	2013-11-15	2	2013	201304	#NULL!	新甲H1	1	1	2	0	0
男	1	2013-11-18	2	2013	201304	#NULL!	新甲H1	1	1	2	0	0
男	1	2013-02-06	1	2013	201301	#NULL!	新甲H1	1	1	1	0	0
女	1	2013-02-18	1	2013	201301	#NULL!	新甲H1	1	1	1	0	0
女	1	2013-03-10	1	2013	201301	#NULL!	新甲H1	1	1	1	0	0
女	1	2013-11-11	1	2013	201304	#NULL!	新甲H1	1	1	1	0	0
男	1	2013-11-18	1	2013	201304	#NULL!	新甲H1	1	1	1	0	0
男	1	2013-12-09	1	2013	201304	#NULL!	新甲H1	1	1	1	0	0
男	1	2013-12-23	1	2013	201304	#NULL!	新甲H1	1	1	1	0	0
女	1	2013-02-08	0	2013	201301	#NULL!	新甲H1	1	1	0	0	0
女	1	2013-03-09	0	2013	201301	#NULL!	新甲H1	1	1	0	0	0
男	1	2013-11-12	0	2013	201304	#NULL!	新甲H1	1	1	0	0	0
女	1	2013-11-23	0	2013	201304	#NULL!	新甲H1	1	1	0	0	0
女	1	2013-02-14	7	2013	201301	#NULL!	新甲H1	1	1	7	1	0
男	1	2013-01-21	4	2013	201301	#NULL!	新甲H1	1	1	4	1	0
女	1	2013-03-10	4	2013	201301	#NULL!	新甲H1	1	1	4	1	0
男	2	2013-09-06	3	2013	201303	#NULL!	新甲H1	1	1	3	0	0
男	2	2013-10-23	2	2013	201304	#NULL!	新甲H1	1	1	2	0	0
女	2	2013-01-27	1	2013	201301	#NULL!	新甲H1	1	1	1	0	0
女	2	2013-02-05	1	2013	201301	#NULL!	新甲H1	1	1	1	0	0
男	2	2013-02-24	1	2013	201301	#NULL!	新甲H1	1	1	1	0	0
男	2	2013-03-10	1	2013	201301	#NULL!	新甲H1	1	1	1	0	0
男	2	2013-03-17	1	2013	201301	#NULL!	新甲H1	1	1	1	0	0
男	2	2013-03-28	1	2013	201301	#NULL!	新甲H1	1	1	1	0	0
男	2	2013-10-12	1	2013	201304	#NULL!	新甲H1	1	1	1	0	0
男	2	2013-10-13	1	2013	201304	#NULL!	新甲H1	1	1	1	0	0
女	2	2013-11-03	1	2013	201304	#NULL!	新甲H1	1	1	1	0	0
女	2	2013-11-29	1	2013	201304	#NULL!	新甲H1	1	1	1	0	0
女	2	2013-12-05	1	2013	201304	#NULL!	新甲H1	1	1	1	0	0
男	2	2013-12-09	1	2013	201304	#NULL!	新甲H1	1	1	1	0	0
男	2	2013-12-10	1	2013	201304	#NULL!	新甲H1	1	1	1	0	0
男	2	2013-02-11	0	2013	201301	#NULL!	新甲H1	1	1	0	0	0
男	2	2013-03-21	0	2013	201301	#NULL!	新甲H1	1	1	0	0	0
女	2	2013-09-22	0	2013	201303	#NULL!	新甲H1	1	1	0	0	0
女	2	2013-10-21	0	2013	201304	#NULL!	新甲H1	1	1	0	0	0
女	2	2013-11-05	0	2013	201304	#NULL!	新甲H1	1	1	0	0	0
男	2	2013-11-18	0	2013	201304	#NULL!	新甲H1	1	1	0	0	0
女	2	2013-10-11	5	2013	201304	#NULL!	新甲H1	1	1	5	1	0
女	2	2013-01-26	4	2013	201301	#NULL!	新甲H1	1	1	4	1	0
女	2	2013-10-28	4	2013	201304	#NULL!	新甲H1	1	1	4	1	0
男	3	2013-09-03	3	2013	201303	#NULL!	新甲H1	1	1	3	0	0
男	3	2013-09-27	3	2013	201303	#NULL!	新甲H1	1	1	3	0	0
男	3	2013-10-13	3	2013	201304	#NULL!	新甲H1	1	1	3	0	0
女	3	2013-11-11	3	2013	201304	#NULL!	新甲H1	1	1	3	0	0
男	3	2013-11-17	3	2013	201304	#NULL!	新甲H1	1	1	3	0	0
女	3	2013-02-24	2	2013	201301	#NULL!	新甲H1	1	1	2	0	0
男	3	2013-03-04	2	2013	201301	#NULL!	新甲H1	1	1	2	0	0
男	3	2013-03-09	2	2013	201301	#NULL!	新甲H1	1	1	2	0	0
男	3	2013-03-10	2	2013	201301	#NULL!	新甲H1	1	1	2	0	0
女	3	2013-04-13	2	2013	201302	#NULL!	新甲H1	1	1	2	0	0
男	3	2013-04-16	2	2013	201302	#NULL!	新甲H1	1	1	2	0	0
男	3	2013-11-08	2	2013	201304	#NULL!	新甲H1	1	1	2	0	0
男	3	2013-11-26	2	2013	201304	#NULL!	新甲H1	1	1	2	0	0
女	3	2013-01-23	1	2013	201301	#NULL!	新甲H1	1	1	1	0	0
男	3	2013-02-19	1	2013	201301	#NULL!	新甲H1	1	1	1	0	0
男	3	2013-02-22	1	2013	201301	#NULL!	新甲H1	1	1	1	0	0
男	3	2013-02-23	1	2013	201301	#NULL!	新甲H1	1	1	1	0	0
男	3	2013-02-24	1	2013	201301	#NULL!	新甲H1	1	1	1	0	0
男	3	2013-02-27	1	2013	201301	#NULL!	新甲H1	1	1	1	0	0
男	3	2013-03-03	1	2013	201301	#NULL!	新甲H1	1	1	1	0	0
男	3	2013-03-19	1	2013	201301	#NULL!	新甲H1	1	1	1	0	0
女	3	2013-03-21	1	2013	201301	#NULL!	新甲H1	1	1	1	0	0
男	3	2013-03-24	1	2013	201301	#NULL!	新甲H1	1	1	1	0	0
男	3	2013-03-27	1	2013	201301	#NULL!	新甲H1	1	1	1	0	0
男	3	2013-03-31	1	2013	201301	#NULL!	新甲H1	1	1	1	0	0
男	3	2013-04-11	1	2013	201302	#NULL!	新甲H1	1	1	1	0	0
男	3	2013-09-12	1	2013	201303	#NULL!	新甲H1	1	1	1	0	0
女	3	2013-10-11	1	2013	201304	#NULL!	新甲H1	1	1	1	0	0
女	3	2013-10-11	1	2013	201304	#NULL!	新甲H1	1	1	1	0	0
男	3	2013-10-21	1	2013	201304	#NULL!	新甲H1	1	1	1	0	0
男	3	2013-10-28	1	2013	201304	#NULL!	新甲H1	1	1	1	0	0
男	3	2013-11-04	1	2013	201304	#NULL!	新甲H1	1	1	1	0	0
男	3	2013-11-06	1	2013	201304	#NULL!	新甲H1	1	1	1	0	0
女	3	2013-12-07	1	2013	201304	#NULL!	新甲H1	1	1	1	0	0
男	3	2013-01-17	0	2013	201301	#NULL!	新甲H1	1	1	0	0	0
男	3	2013-01-30	0	2013	201301	#NULL!	新甲H1	1	1	0	0	0
男	3	2013-02-05	0	2013	201301	#NULL!	新甲H1	1	1	0	0	0
男	3	2013-03-04	0	2013	201301	#NULL!	新甲H1	1	1	0	0	0
男	3	2013-05-21	0	2013	201302	#NULL!	新甲H1	1	1	0	0	0
女	3	2013-11-01	0	2013	201304	#NULL!	新甲H1	1	1	0	0	0
男	3	2013-11-26	0	2013	201304	#NULL!	新甲H1	1	1	0	0	0
女	3	2013-12-02	0	2013	201304	#NULL!	新甲H1	1	1	0	0	0
男	3	2013-11-10	8	2013	201304	#NULL!	新甲H1	1	1	8	1	0
男	3	2013-02-17	4	2013	201301	#NULL!	新甲H1	1	1	4	1	0
男	3	2013-02-17	4	2013	201301	#NULL!	新甲H1	1	1	4	1	0
男	3	2013-03-10	4	2013	201301	#NULL!	新甲H1	1	1	4	1	0
女	4	2013-04-03	2	2013	201302	#NULL!	新甲H1	1	1	12	0	0
女	4	2013-01-28	3	2013	201301	#NULL!	新甲H1	1	1	3	0	0
男	4	2013-05-07	3	2013	201302	#NULL!	新甲H1	1	1	3	0	0
男	4	2013-10-23	3	2013	201304	#NULL!	新甲H1	1	1	3	0	0
女	4	2013-12-15	3	2013	201304	#NULL!	新甲H1	1	1	3	0	0
女	4	2013-01-11	2	2013	201301	#NULL!	新甲H1	1	1	2	0	0
男	4	2013-01-19	2	2013	201301	#NULL!	新甲H1	1	1	2	0	0
男	4	2013-01-27	2	2013	201301	#NULL!	新甲H1	1	1	2	0	0
男	4	2013-02-26	2	2013	201301	#NULL!	新甲H1	1	1	2	0	0
男	4	2013-03-12	2	2013	201301	#NULL!	新甲H1	1	1	2	0	0
男	4	2013-10-15	2	2013	201304	#NULL!	新甲H1	1	1	2	0	0
男	4	2013-10-20	2	2013	201304	#NULL!	新甲H1	1	1	2	0	0
女	4	2013-10-27	2	2013	201304	#NULL!	新甲H1	1	1	2	0	0
男	4	2013-11-02	2	2013	201304	#NULL!	新甲H1	1	1	2	0	0
女	4	2013-01-21	1	2013	201301	#NULL!	新甲H1	1	1	1	0	0
女	4	2013-03-08	1	2013	201301	#NULL!	新甲H1	1	1	1	0	0
女	4	2013-03-10	1	2013	201301	#NULL!	新甲H1	1	1	1	0	0
男	4	2013-03-10	1	2013	201301	#NULL!	新甲H1	1	1	1	0	0
男	4	2013-03-21	1	2013	201301	#NULL!	新甲H1	1	1	1	0	0
男	4	2013-04-07	1	2013	201302	#NULL!	新甲H1	1	1	1	0	0
男	4	2013-05-07	1	2013	201302	#NULL!	新甲H1	1	1	1	0	0
女	4	2013-05-21	1	2013	201302	#NULL!	新甲H1	1	1	1	0	0
女	4	2013-10-10	1	2013	201304	#NULL!	新甲H1	1	1	1	0	0
男	4	2013-10-20	1	2013	201304	#NULL!	新甲H1	1	1	1	0	0
男	4	2013-10-20	1	2013	201304	#NULL!	新甲H1	1	1	1	0	0
女	4	2013-10-21	1	2013	201304	#NULL!	新甲H1	1	1	1	0	0
女	4	2013-10-27	1	2013	201304	#NULL!	新甲H1	1	1	1	0	0
女	4	2013-10-31	1	2013	201304	#NULL!	新甲H1	1	1	1	0	0
男	4	2013-11-20	1	2013	201304	#NULL!	新甲H1	1	1	1	0	0
男	4	2013-12-01	1	2013	201304	#NULL!	新甲H1	1	1	1	0	0
男	4	2013-12-04	1	2013	201304	#NULL!	新甲H1	1	1	1	0	0
男	4	2013-12-04	1	2013	201304	#NULL!	新甲H1	1	1	1	0	0
男	4	2013-02-05	0	2013	201301	#NULL!	新甲H1	1	1	0	0	0
男	4	2013-02-25	0	2013	201301	#NULL!	新甲H1	1	1	0	0	0
女	4	2013-03-01	0	2013	201301	#NULL!	新甲H1	1	1	0	0	0
女	4	2013-03-07	0	2013	201301	#NULL!	新甲H1	1	1	0	0	0
男	4	2013-03-11	0	2013	201301	#NULL!	新甲H1	1	1	0	0	0
女	4	2013-03-25	0	2013	201301	#NULL!	新甲H1	1	1	0	0	0
男	4	2013-04-17	0	2013	201302	#NULL!	新甲H1	1	1	0	0	0
男	4	2013-10-12	0	2013	201304	#NULL!	新甲H1	1	1	0	0	0
男	4	2013-11-01	0	2013	201304	#NULL!	新甲H1	1	1	0	0	0
男	4	2013-11-21	0	2013	201304	#NULL!	新甲H1	1	1	0	0	0
女	4	2013-11-22	0	2013	201304	#NULL!	新甲H1	1	1	0	0	0
男	4	2013-11-28	0	2013	201304	#NULL!	新甲H1	1	1	0	0	0
男	4	2013-10-28	4	2013	201304	#NULL!	新甲H1	1	1	4	1	0
女	5	2013-10-20	3	2013	201304	#NULL!	新甲H1	2	1	3	0	1
男	5	2013-12-28	3	2013	201304	#NULL!	新甲H1	2	1	3	0	1
男	5	2013-01-14	2	2013	201301	#NULL!	新甲H1	2	1	2	0	1
男	5	2013-01-19	2	2013	201301	#NULL!	新甲H1	2	1	2	0	1
女	5	2013-02-26	2	2013	201301	#NULL!	新甲H1	2	1	2	0	1
女	5	2013-03-05	2	2013	201301	#NULL!	新甲H1	2	1	2	0	1
男	5	2013-03-07	2	2013	201301	#NULL!	新甲H1	2	1	2	0	1
男	5	2013-03-16	2	2013	201301	#NULL!	新甲H1	2	1	2	0	1
女	5	2013-03-23	2	2013	201301	#NULL!	新甲H1	2	1	2	0	1
男	5	2013-03-30	2	2013	201301	#NULL!	新甲H1	2	1	2	0	1
女	5	2013-10-06	2	2013	201304	#NULL!	新甲H1	2	1	2	0	1
男	5	2013-10-13	2	2013	201304	#NULL!	新甲H1	2	1	2	0	1
女	5	2013-10-14	2	2013	201304	#NULL!	新甲H1	2	1	2	0	1
女	5	2013-11-09	2	2013	201304	#NULL!	新甲H1	2	1	2	0	1
男	5	2013-01-16	1	2013	201301	#NULL!	新甲H1	2	1	1	0	1
男	5	2013-01-22	1	2013	201301	#NULL!	新甲H1	2	1	1	0	1
女	5	2013-03-06	1	2013	201301	#NULL!	新甲H1	2	1	1	0	1
女	5	2013-03-07	1	2013	201301	#NULL!	新甲H1	2	1	1	0	1
男	5	2013-03-11	1	2013	201301	#NULL!	新甲H1	2	1	1	0	1
女	5	2013-03-14	1	2013	201301	#NULL!	新甲H1	2	1	1	0	1
女	5	2013-03-22	1	2013	201301	#NULL!	新甲H1	2	1	1	0	1
女	5	2013-03-25	1	2013	201301	#NULL!	新甲H1	2	1	1	0	1
女	5	2013-03-31	1	2013	201301	#NULL!	新甲H1	2	1	1	0	1
男	5	2013-05-09	1	2013	201302	#NULL!	新甲H1	2	1	1	0	1
女	5	2013-09-06	1	2013	201303	#NULL!	新甲H1	2	1	1	0	1
男	5	2013-10-10	1	2013	201304	#NULL!	新甲H1	2	1	1	0	1
女	5	2013-10-14	1	2013	201304	#NULL!	新甲H1	2	1	1	0	1
男	5	2013-10-14	1	2013	201304	#NULL!	新甲H1	2	1	1	0	1
女	5	2013-10-16	1	2013	201304	#NULL!	新甲H1	2	1	1	0	1
女	5	2013-10-17	1	2013	201304	#NULL!	新甲H1	2	1	1	0	1
男	5	2013-10-24	1	2013	201304	#NULL!	新甲H1	2	1	1	0	1
女	5	2013-10-30	1	2013	201304	#NULL!	新甲H1	2	1	1	0	1
女	5	2013-10-30	1	2013	201304	#NULL!	新甲H1	2	1	1	0	1
男	5	2013-11-05	1	2013	201304	#NULL!	新甲H1	2	1	1	0	1
女	5	2013-11-14	1	2013	201304	#NULL!	新甲H1	2	1	1	0	1
男	5	2013-11-14	1	2013	201304	#NULL!	新甲H1	2	1	1	0	1
女	5	2013-11-27	1	2013	201304	#NULL!	新甲H1	2	1	1	0	1
男	5	2013-12-05	1	2013	201304	#NULL!	新甲H1	2	1	1	0	1
女	5	2013-12-10	1	2013	201304	#NULL!	新甲H1	2	1	1	0	1
男	5	2013-12-22	1	2013	201304	#NULL!	新甲H1	2	1	1	0	1
男	5	2013-01-21	0	2013	201301	#NULL!	新甲H1	2	1	0	0	1
男	5	2013-02-11	0	2013	201301	#NULL!	新甲H1	2	1	0	0	1
男	5	2013-03-08	0	2013	201301	#NULL!	新甲H1	2	1	0	0	1
男	5	2013-03-10	0	2013	201301	#NULL!	新甲H1	2	1	0	0	1
男	5	2013-03-14	0	2013	201301	#NULL!	新甲H1	2	1	0	0	1
女	5	2013-03-15	0	2013	201301	#NULL!	新甲H1	2	1	0	0	1
男	5	2013-03-25	0	2013	201301	#NULL!	新甲H1	2	1	0	0	1
女	5	2013-11-15	0	2013	201304	#NULL!	新甲H1	2	1	0	0	1
女	5	2013-12-12	0	2013	201304	#NULL!	新甲H1	2	1	0	0	1
女	6	2013-02-01	3	2013	201301	#NULL!	新甲H1	2	1	3	0	1
女	6	2013-10-24	3	2013	201304	#NULL!	新甲H1	2	1	3	0	1
女	6	2013-10-27	3	2013	201304	#NULL!	新甲H1	2	1	3	0	1
女	6	2013-10-27	3	2013	201304	#NULL!	新甲H1	2	1	3	0	1
男	6	2013-11-15	3	2013	201304	#NULL!	新甲H1	2	1	3	0	1
男	6	2013-01-07	2	2013	201301	#NULL!	新甲H1	2	1	2	0	1
男	6	2013-10-09	2	2013	201304	#NULL!	新甲H1	2	1	2	0	1
女	6	2013-10-28	2	2013	201304	#NULL!	新甲H1	2	1	2	0	1
男	6	2013-11-02	2	2013	201304	#NULL!	新甲H1	2	1	2	0	1
女	6	2013-11-05	2	2013	201304	#NULL!	新甲H1	2	1	2	0	1
女	6	2013-01-21	1	2013	201301	#NULL!	新甲H1	2	1	1	0	1
男	6	2013-02-16	1	2013	201301	#NULL!	新甲H1	2	1	1	0	1
男	6	2013-03-07	1	2013	201301	#NULL!	新甲H1	2	1	1	0	1
女	6	2013-03-11	1	2013	201301	#NULL!	新甲H1	2	1	1	0	1
男	6	2013-04-08	1	2013	201302	#NULL!	新甲H1	2	1	1	0	1
男	6	2013-10-06	1	2013	201304	#NULL!	新甲H1	2	1	1	0	1
女	6	2013-10-11	1	2013	201304	#NULL!	新甲H1	2	1	1	0	1
男	6	2013-10-19	1	2013	201304	#NULL!	新甲H1	2	1	1	0	1
男	6	2013-10-19	1	2013	201304	#NULL!	新甲H1	2	1	1	0	1
女	6	2013-10-30	1	2013	201304	#NULL!	新甲H1	2	1	1	0	1
男	6	2013-11-05	1	2013	201304	#NULL!	新甲H1	2	1	1	0	1
男	6	2013-11-05	1	2013	201304	#NULL!	新甲H1	2	1	1	0	1
男	6	2013-11-07	1	2013	201304	#NULL!	新甲H1	2	1	1	0	1
女	6	2013-11-09	1	2013	201304	#NULL!	新甲H1	2	1	1	0	1
女	6	2013-11-13	1	2013	201304	#NULL!	新甲H1	2	1	1	0	1
男	6	2013-11-13	1	2013	201304	#NULL!	新甲H1	2	1	1	0	1
女	6	2013-11-14	1	2013	201304	#NULL!	新甲H1	2	1	1	0	1
男	6	2013-11-17	1	2013	201304	#NULL!	新甲H1	2	1	1	0	1
男	6	2013-11-17	1	2013	201304	#NULL!	新甲H1	2	1	1	0	1
男	6	2013-11-18	1	2013	201304	#NULL!	新甲H1	2	1	1	0	1
男	6	2013-12-19	1	2013	201304	#NULL!	新甲H1	2	1	1	0	1
女	6	2013-02-01	0	2013	201301	#NULL!	新甲H1	2	1	0	0	1
女	6	2013-02-27	0	2013	201301	#NULL!	新甲H1	2	1	0	0	1
女	6	2013-03-10	0	2013	201301	#NULL!	新甲H1	2	1	0	0	1
男	6	2013-03-25	0	2013	201301	#NULL!	新甲H1	2	1	0	0	1
女	6	2013-05-01	0	2013	201302	#NULL!	新甲H1	2	1	0	0	1
女	6	2013-10-14	0	2013	201304	#NULL!	新甲H1	2	1	0	0	1
女	6	2013-10-14	0	2013	201304	#NULL!	新甲H1	2	1	0	0	1
男	6	2013-10-25	0	2013	201304	#NULL!	新甲H1	2	1	0	0	1
男	6	2013-10-29	0	2013	201304	#NULL!	新甲H1	2	1	0	0	1
男	6	2013-11-20	0	2013	201304	#NULL!	新甲H1	2	1	0	0	1
女	6	2013-11-29	0	2013	201304	#NULL!	新甲H1	2	1	0	0	1
男	6	2013-12-06	0	2013	201304	#NULL!	新甲H1	2	1	0	0	1
男	6	2013-03-10	4	2013	201301	#NULL!	新甲H1	2	1	4	1	1
男	7	2013-01-24	3	2013	201301	#NULL!	新甲H1	2	1	3	0	1
男	7	2013-10-27	3	2013	201304	#NULL!	新甲H1	2	1	3	0	1
男	7	2013-11-10	3	2013	201304	#NULL!	新甲H1	2	1	3	0	1
男	7	2013-03-02	2	2013	201301	#NULL!	新甲H1	2	1	2	0	1
男	7	2013-03-07	2	2013	201301	#NULL!	新甲H1	2	1	2	0	1
女	7	2013-03-09	2	2013	201301	#NULL!	新甲H1	2	1	2	0	1
男	7	2013-11-26	2	2013	201304	#NULL!	新甲H1	2	1	2	0	1
男	7	2013-01-23	1	2013	201301	#NULL!	新甲H1	2	1	1	0	1
男	7	2013-02-17	1	2013	201301	#NULL!	新甲H1	2	1	1	0	1
女	7	2013-02-27	1	2013	201301	#NULL!	新甲H1	2	1	1	0	1
女	7	2013-03-02	1	2013	201301	#NULL!	新甲H1	2	1	1	0	1
男	7	2013-03-03	1	2013	201301	#NULL!	新甲H1	2	1	1	0	1
男	7	2013-03-03	1	2013	201301	#NULL!	新甲H1	2	1	1	0	1
男	7	2013-10-12	1	2013	201304	#NULL!	新甲H1	2	1	1	0	1
男	7	2013-10-17	1	2013	201304	#NULL!	新甲H1	2	1	1	0	1
男	7	2013-10-23	1	2013	201304	#NULL!	新甲H1	2	1	1	0	1
女	7	2013-10-31	1	2013	201304	#NULL!	新甲H1	2	1	1	0	1
男	7	2013-10-31	1	2013	201304	#NULL!	新甲H1	2	1	1	0	1
男	7	2013-10-31	1	2013	201304	#NULL!	新甲H1	2	1	1	0	1
男	7	2013-11-04	1	2013	201304	#NULL!	新甲H1	2	1	1	0	1
男	7	2013-11-05	1	2013	201304	#NULL!	新甲H1	2	1	1	0	1
男	7	2013-11-13	1	2013	201304	#NULL!	新甲H1	2	1	1	0	1
女	7	2013-11-20	1	2013	201304	#NULL!	新甲H1	2	1	1	0	1
女	7	2013-03-07	0	2013	201301	#NULL!	新甲H1	2	1	0	0	1
男	7	2013-03-13	0	2013	201301	#NULL!	新甲H1	2	1	0	0	1
男	7	2013-10-12	0	2013	201304	#NULL!	新甲H1	2	1	0	0	1
男	7	2013-11-05	0	2013	201304	#NULL!	新甲H1	2	1	0	0	1
男	7	2013-11-18	0	2013	201304	#NULL!	新甲H1	2	1	0	0	1
男	7	2013-03-19	6	2013	201301	#NULL!	新甲H1	2	1	6	1	1
女	8	2013-10-28	2	2013	201304	#NULL!	新甲H1	2	1	2	0	1
女	8	2013-11-04	2	2013	201304	#NULL!	新甲H1	2	1	2	0	1
男	8	2013-11-11	2	2013	201304	#NULL!	新甲H1	2	1	2	0	1
男	8	2013-11-24	2	2013	201304	#NULL!	新甲H1	2	1	2	0	1
男	8	2013-12-04	2	2013	201304	#NULL!	新甲H1	2	1	2	0	1
男	8	2013-03-20	1	2013	201301	#NULL!	新甲H1	2	1	1	0	1
男	8	2013-10-31	1	2013	201304	#NULL!	新甲H1	2	1	1	0	1
男	8	2013-11-03	1	2013	201304	#NULL!	新甲H1	2	1	1	0	1
男	8	2013-11-04	1	2013	201304	#NULL!	新甲H1	2	1	1	0	1
男	8	2013-11-21	1	2013	201304	#NULL!	新甲H1	2	1	1	0	1
男	8	2013-11-25	1	2013	201304	#NULL!	新甲H1	2	1	1	0	1
男	8	2013-02-10	0	2013	201301	#NULL!	新甲H1	2	1	0	0	1
女	8	2013-03-11	0	2013	201301	#NULL!	新甲H1	2	1	0	0	1
男	8	2013-11-08	0	2013	201304	#NULL!	新甲H1	2	1	0	0	1
男	9	2013-10-26	2	2013	201304	#NULL!	新甲H1	2	1	2	0	1
男	9	2013-11-01	2	2013	201304	#NULL!	新甲H1	2	1	2	0	1
女	9	2013-11-17	2	2013	201304	#NULL!	新甲H1	2	1	2	0	1
女	9	2013-03-20	1	2013	201301	#NULL!	新甲H1	2	1	1	0	1
女	9	2013-10-31	1	2013	201304	#NULL!	新甲H1	2	1	1	0	1
女	9	2013-11-03	1	2013	201304	#NULL!	新甲H1	2	1	1	0	1
男	9	2013-11-07	1	2013	201304	#NULL!	新甲H1	2	1	1	0	1
男	9	2013-04-07	0	2013	201302	#NULL!	新甲H1	2	1	0	0	1
男	10	2013-11-12	2	2013	201304	#NULL!	新甲H1	3	1	2	0	1
男	10	2013-11-12	2	2013	201304	#NULL!	新甲H1	3	1	2	0	1
男	10	2013-11-13	2	2013	201304	#NULL!	新甲H1	3	1	2	0	1
男	10	2013-11-13	2	2013	201304	#NULL!	新甲H1	3	1	2	0	1
女	10	2013-12-14	2	2013	201304	#NULL!	新甲H1	3	1	2	0	1
男	10	2013-01-20	1	2013	201301	#NULL!	新甲H1	3	1	1	0	1
男	10	2013-03-01	1	2013	201301	#NULL!	新甲H1	3	1	1	0	1
男	10	2013-03-02	1	2013	201301	#NULL!	新甲H1	3	1	1	0	1
女	10	2013-03-24	1	2013	201301	#NULL!	新甲H1	3	1	1	0	1
女	10	2013-04-07	1	2013	201302	#NULL!	新甲H1	3	1	1	0	1
女	10	2013-01-18	0	2013	201301	#NULL!	新甲H1	3	1	0	0	1
[truncated: 1,315 more rows]
